# Supplementary material for: First crAss-Like Phage Genome Encoding the Diversity-Generating Retroelement (DGR)
Source: MDPI journal article supplement (doi:10.3390/v12050573), 2020-05-22

Threshold = 39

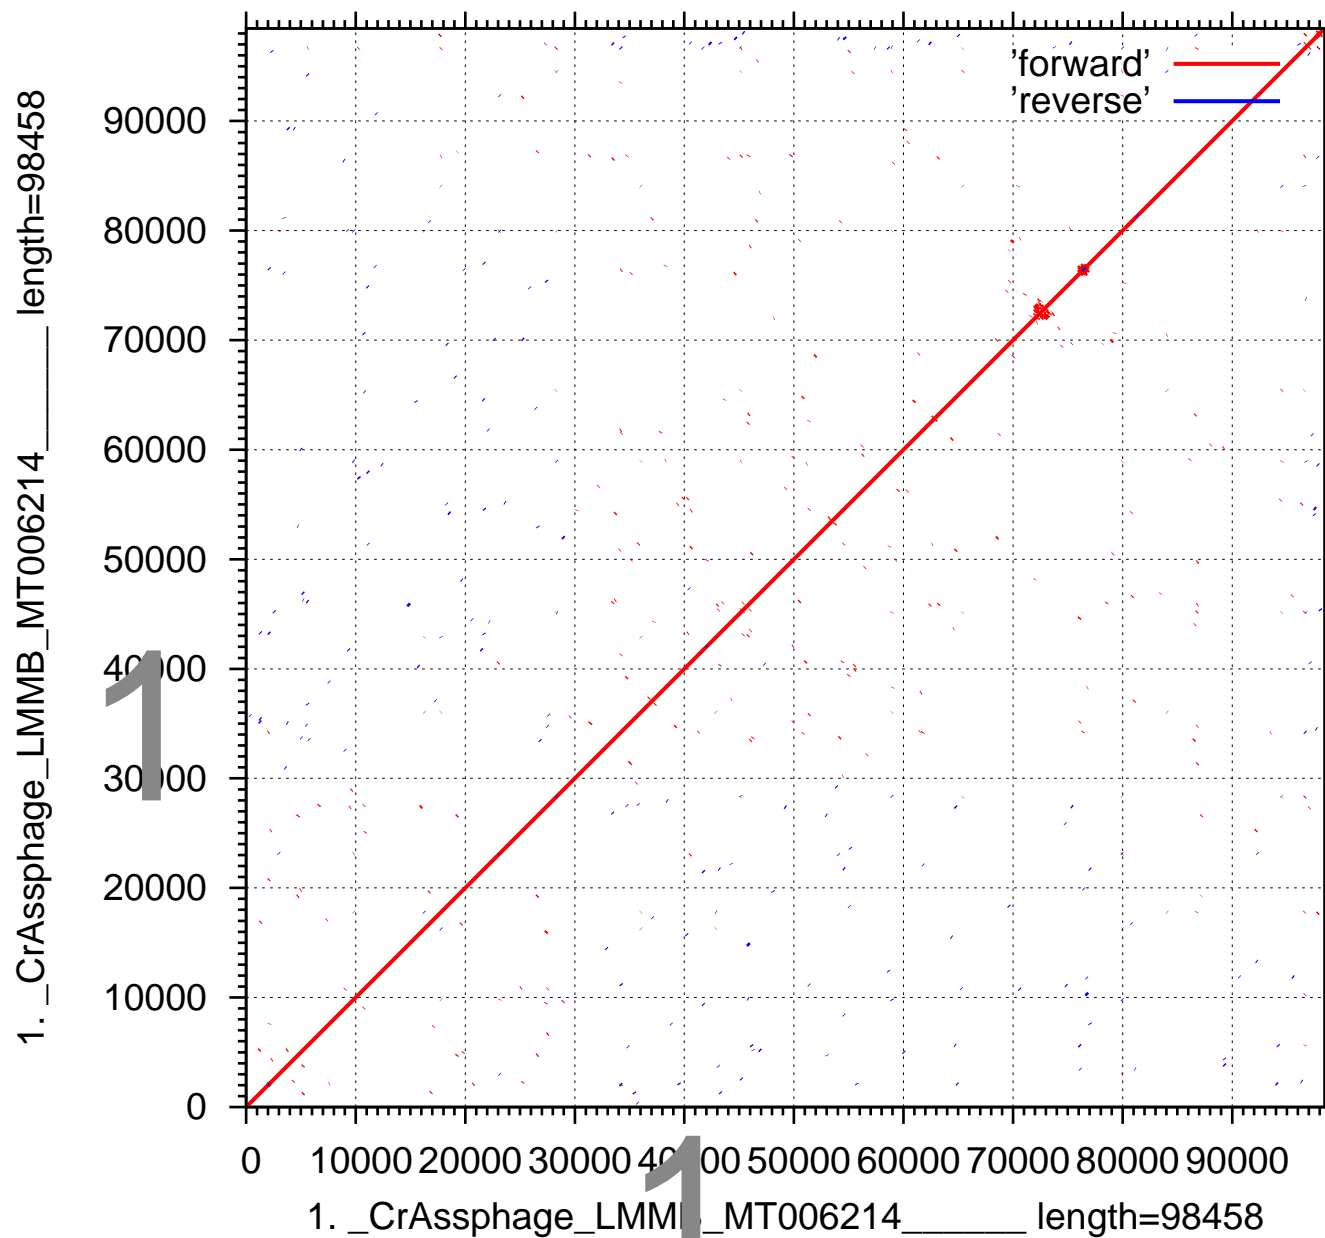

Threshold = 39

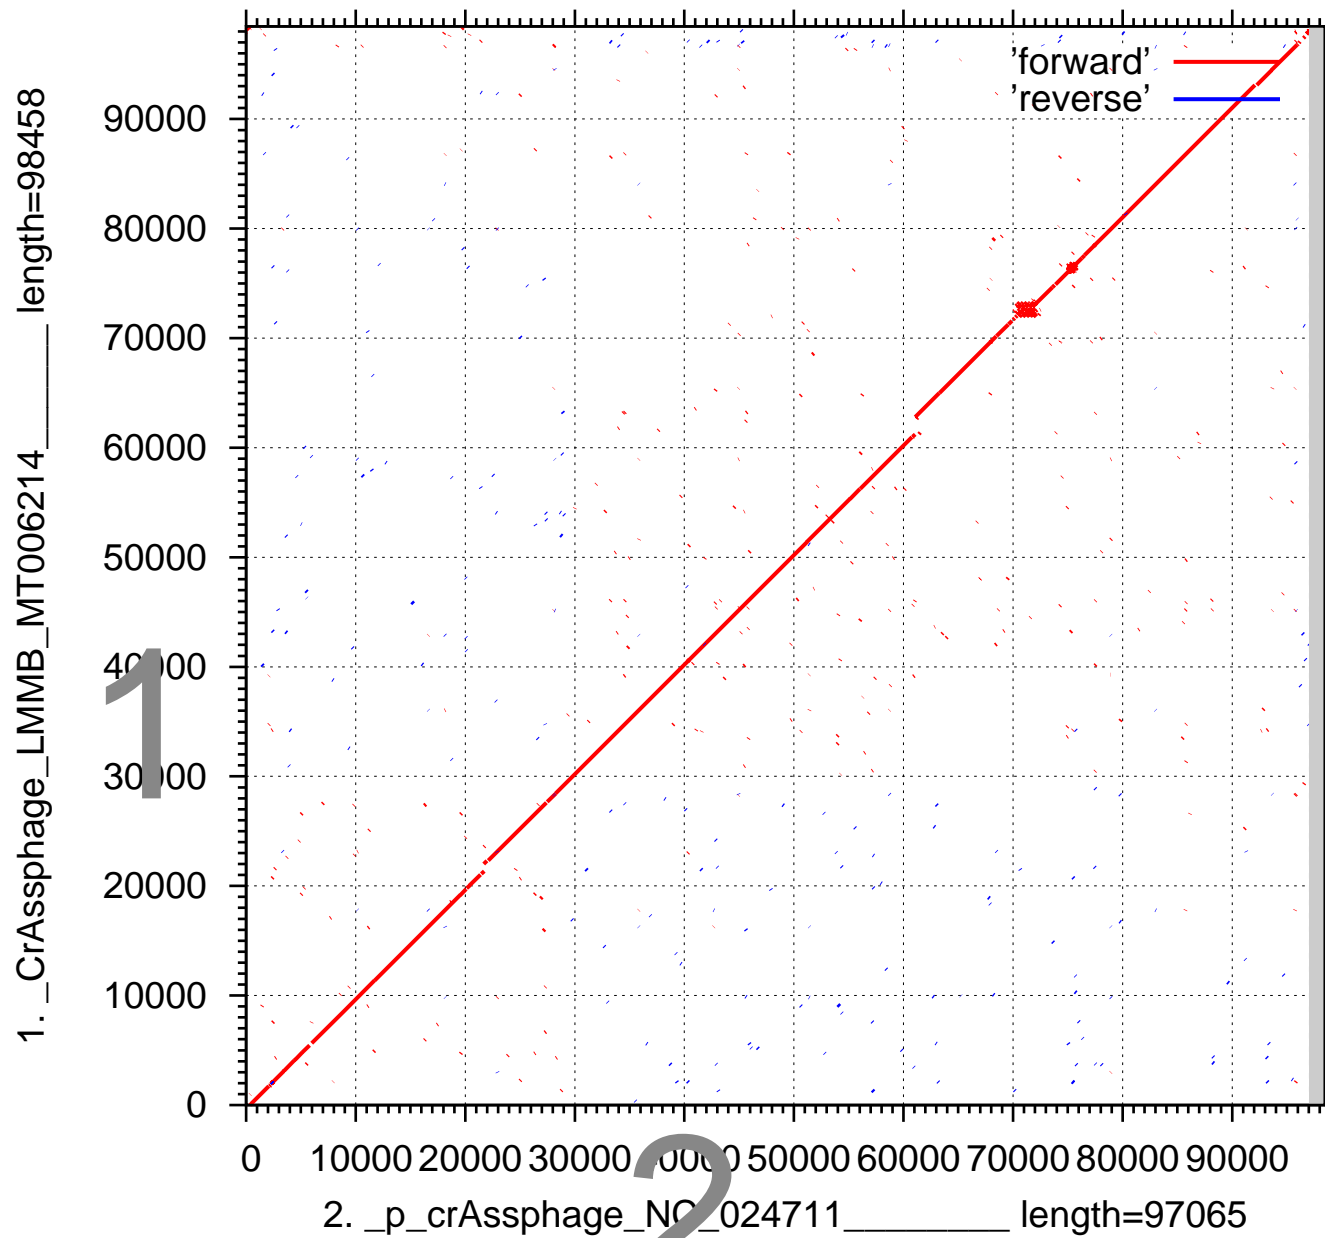

Threshold = 39

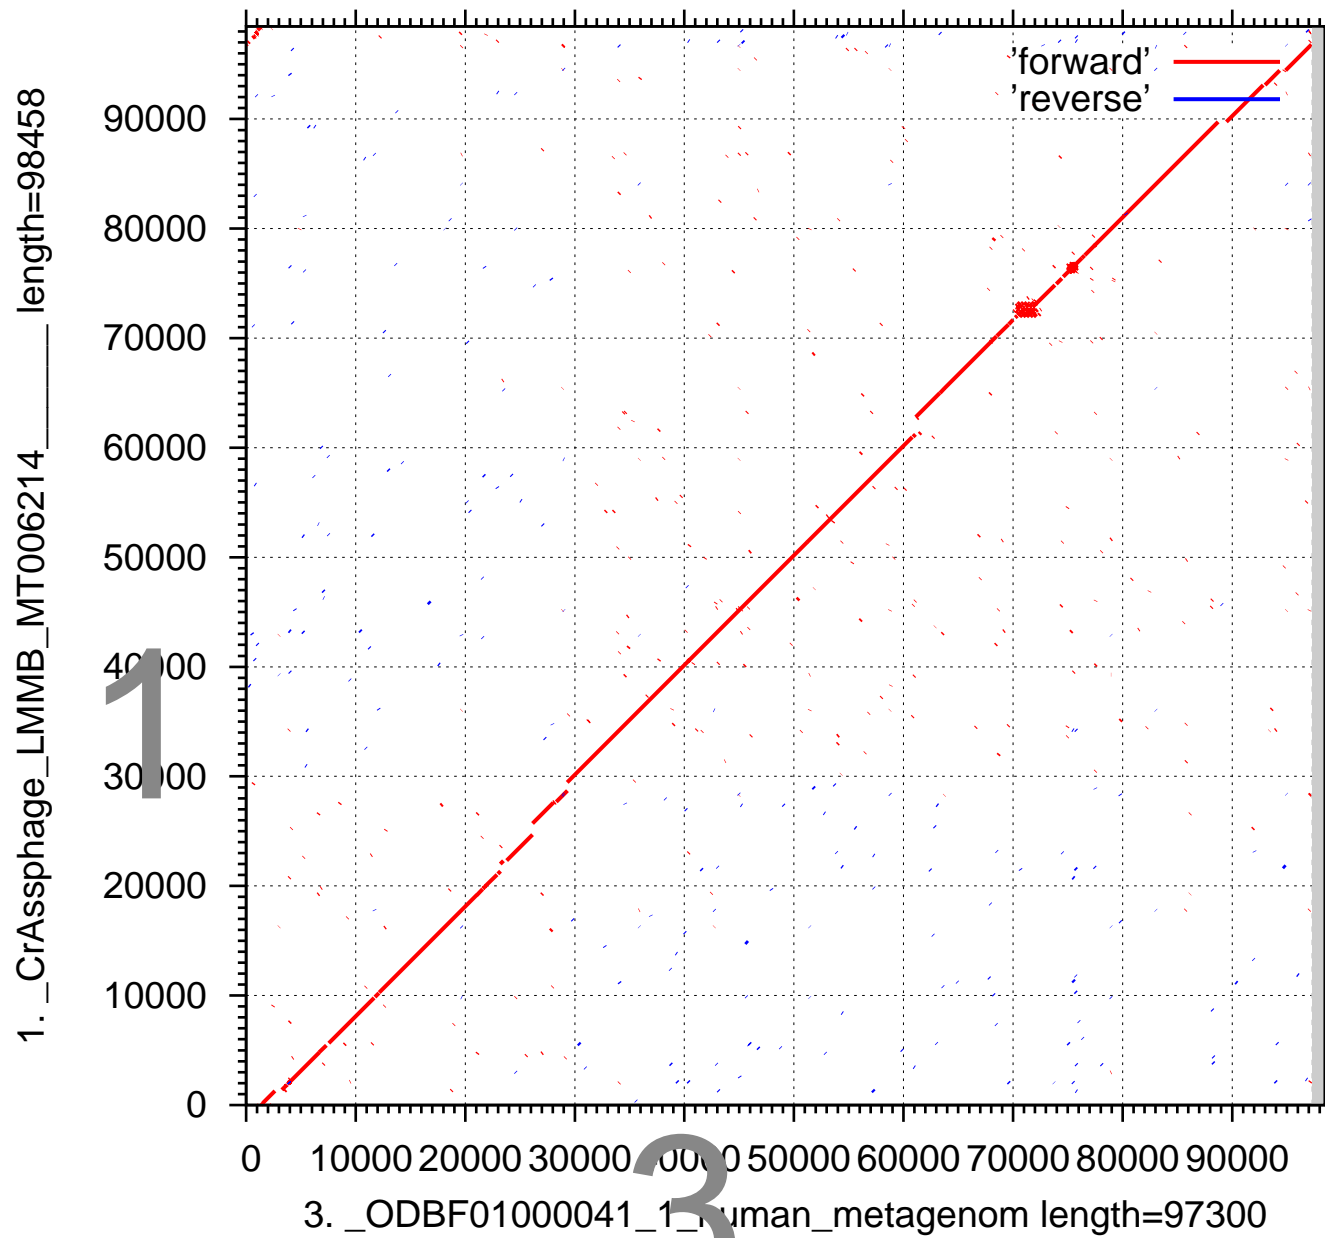

Threshold = 39

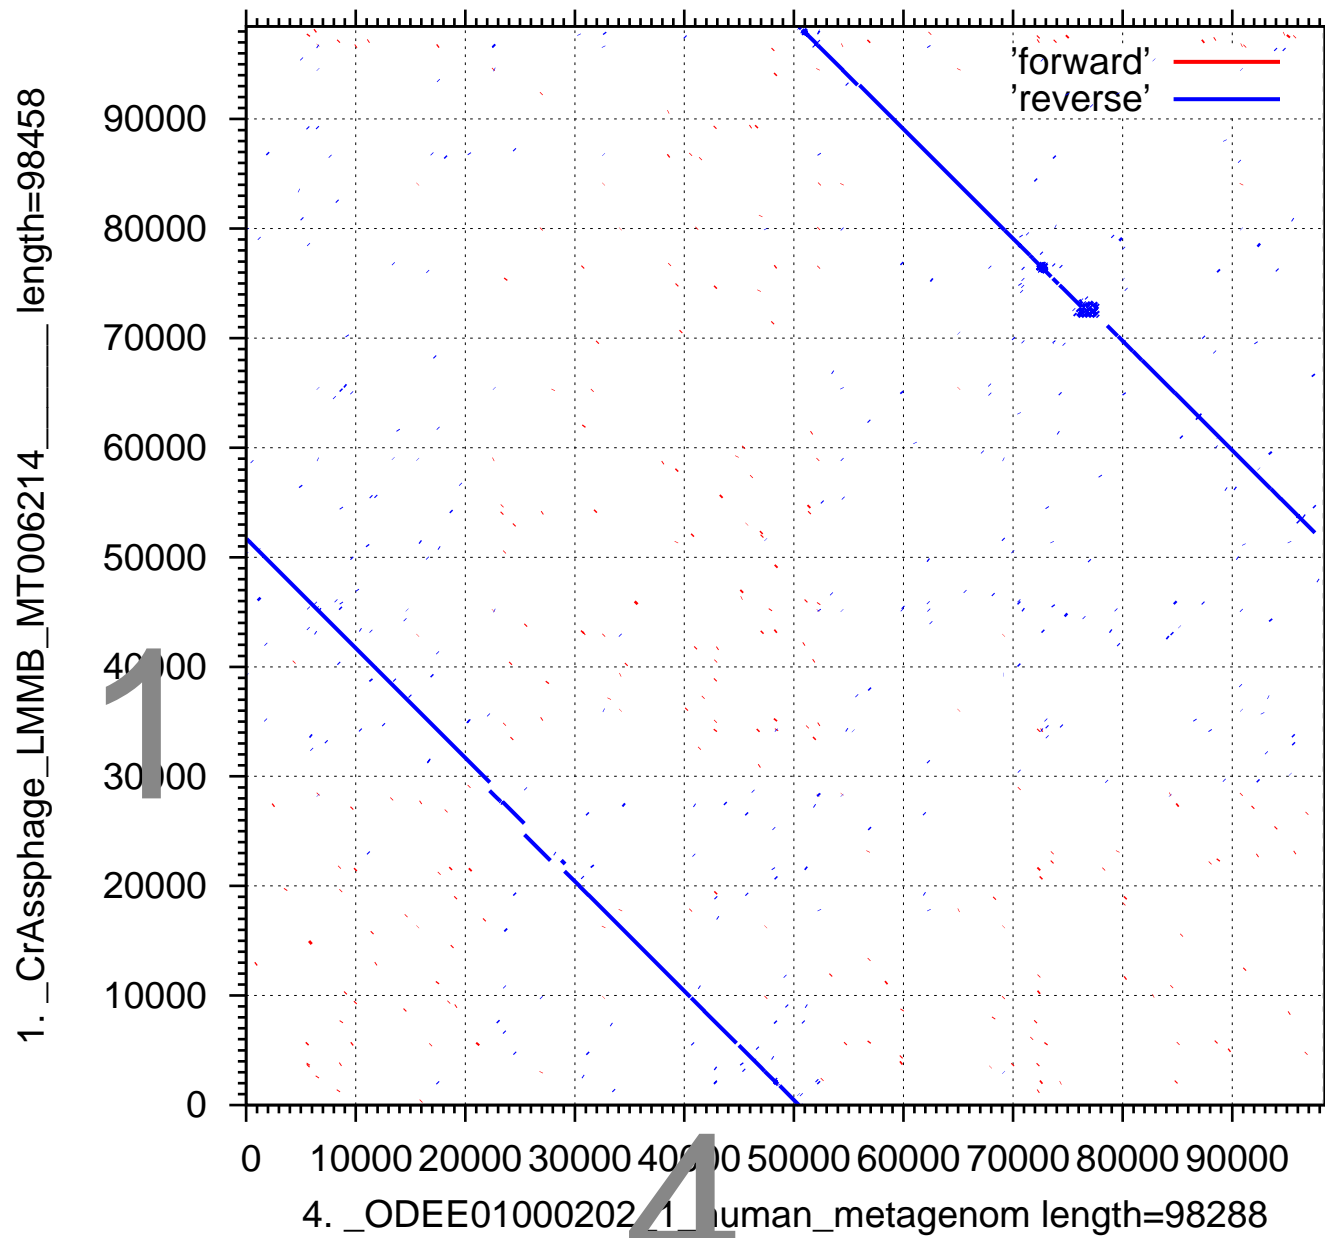

Threshold = 39

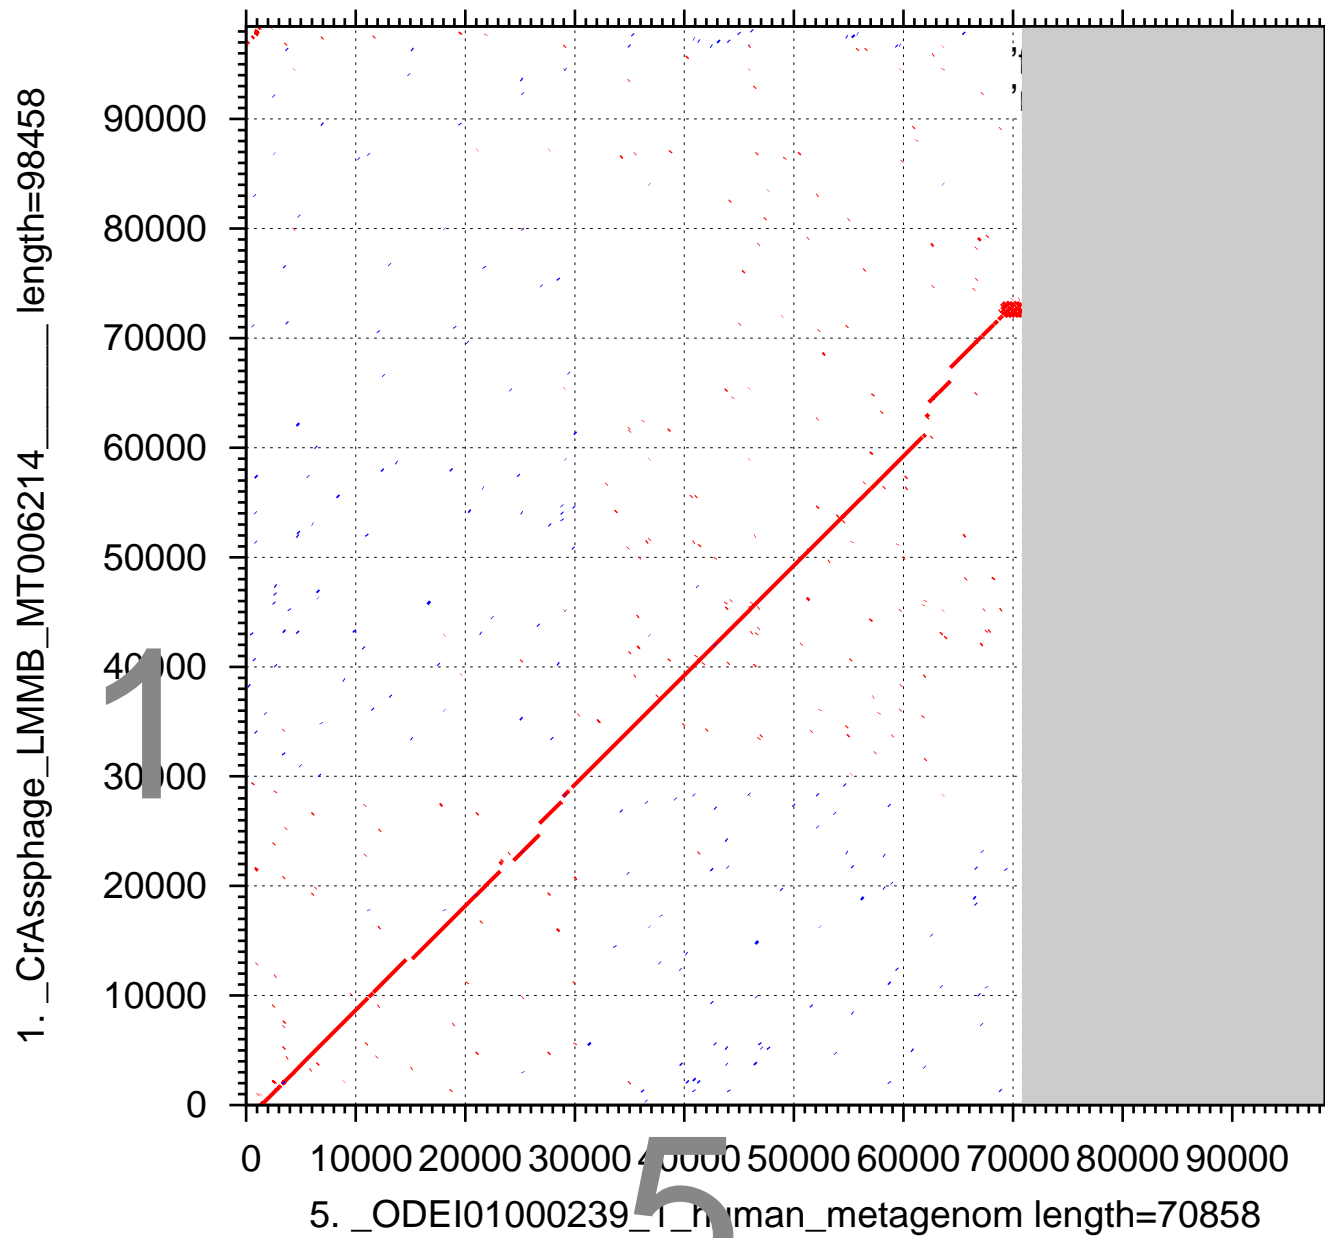

6

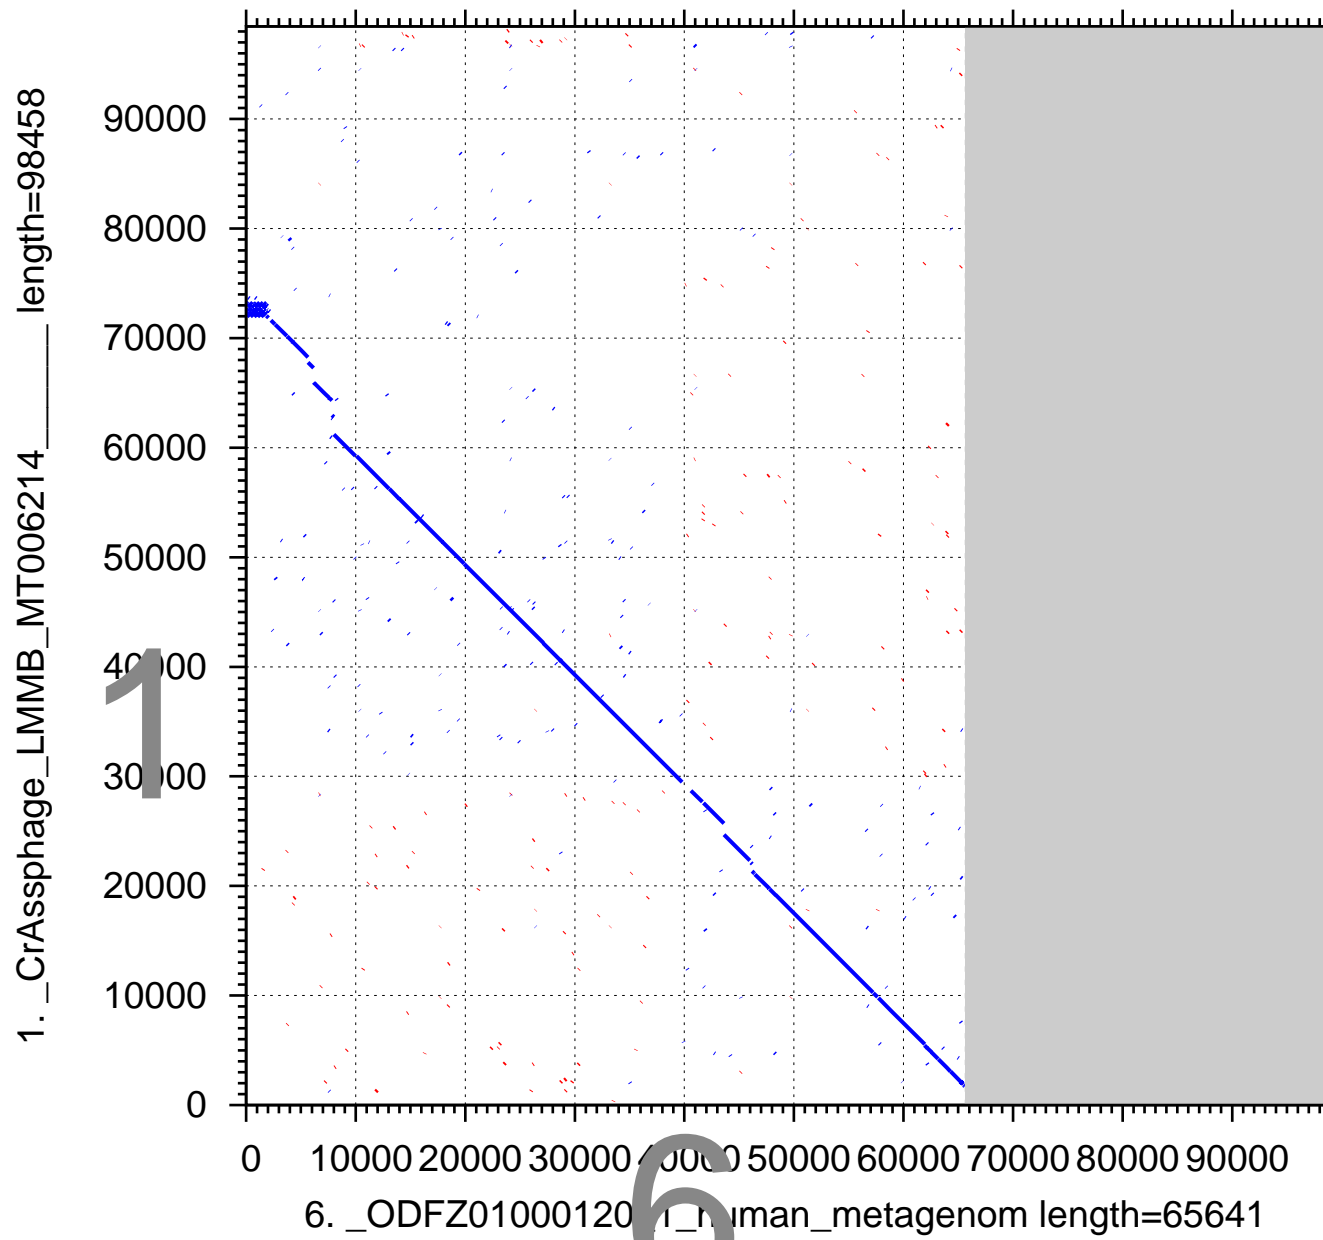

Threshold = 39

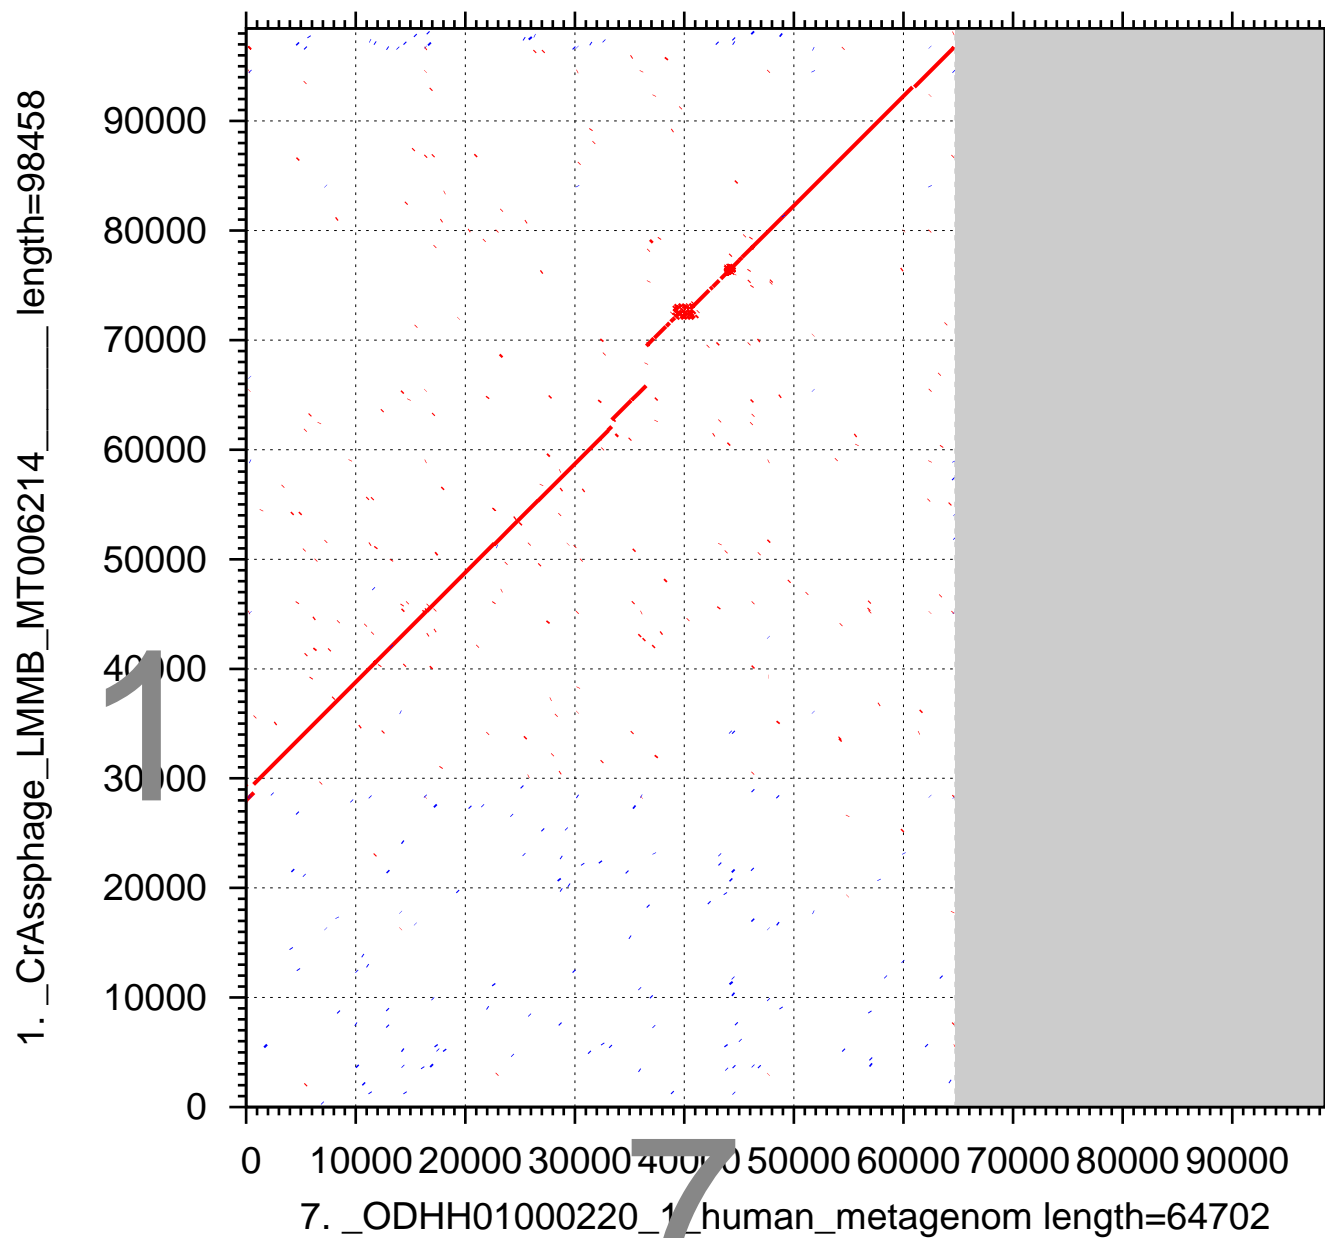

Threshold = 39

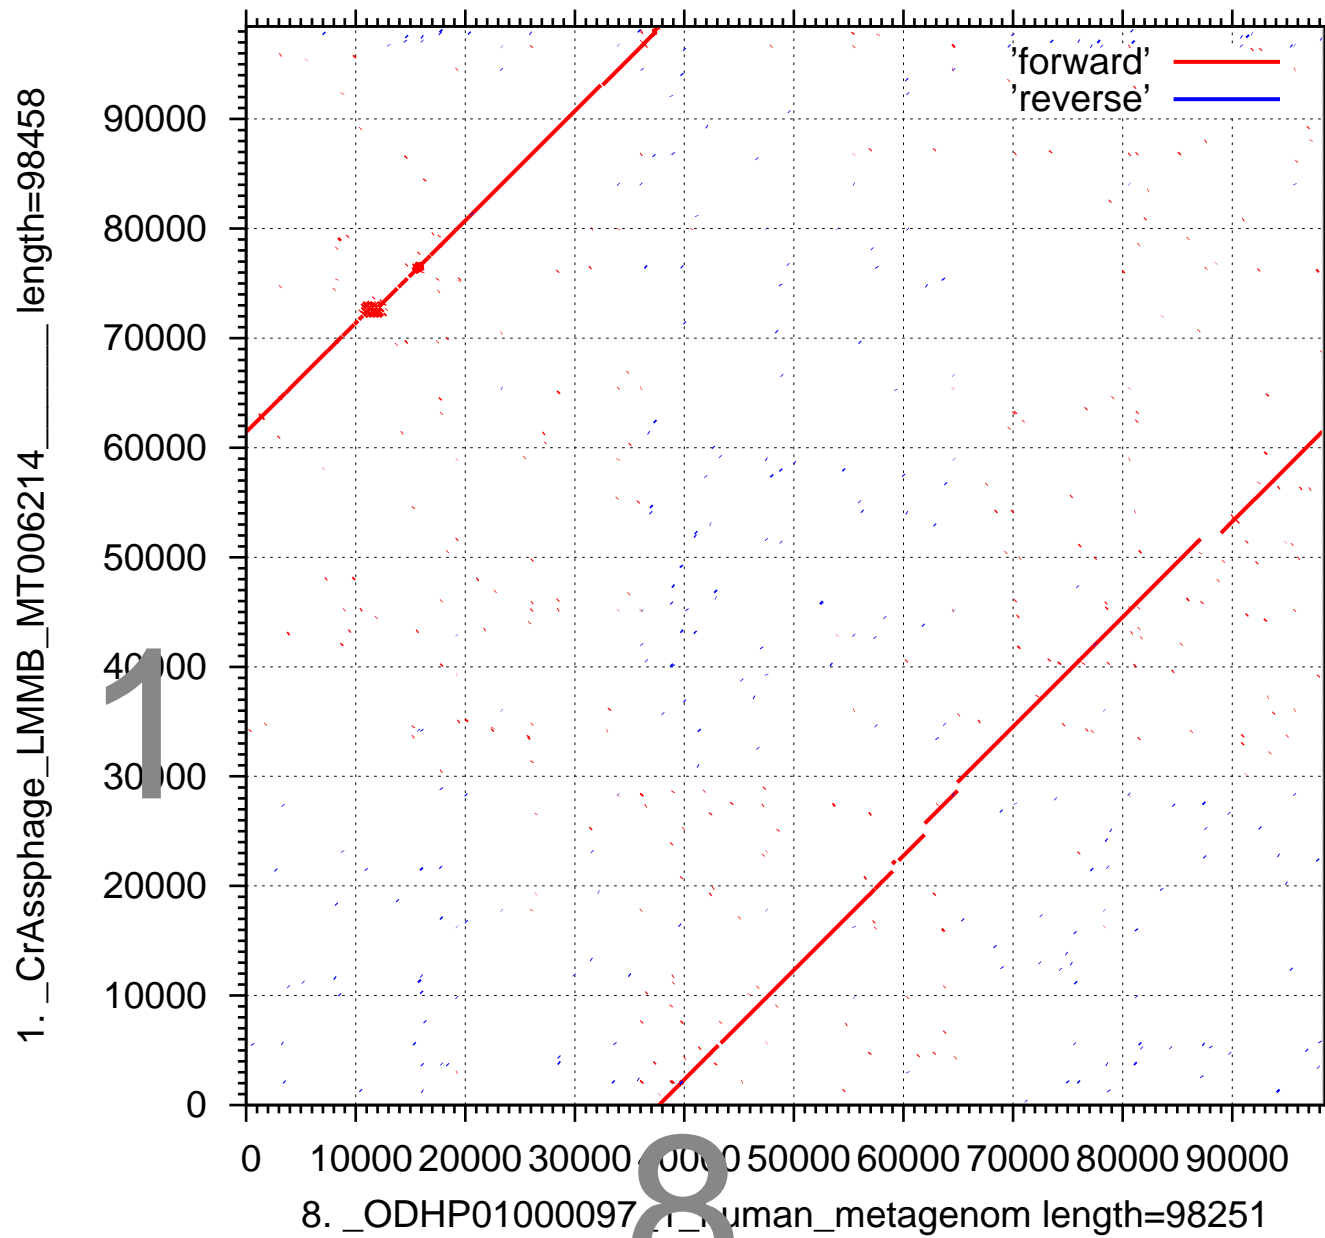

Threshold = 39

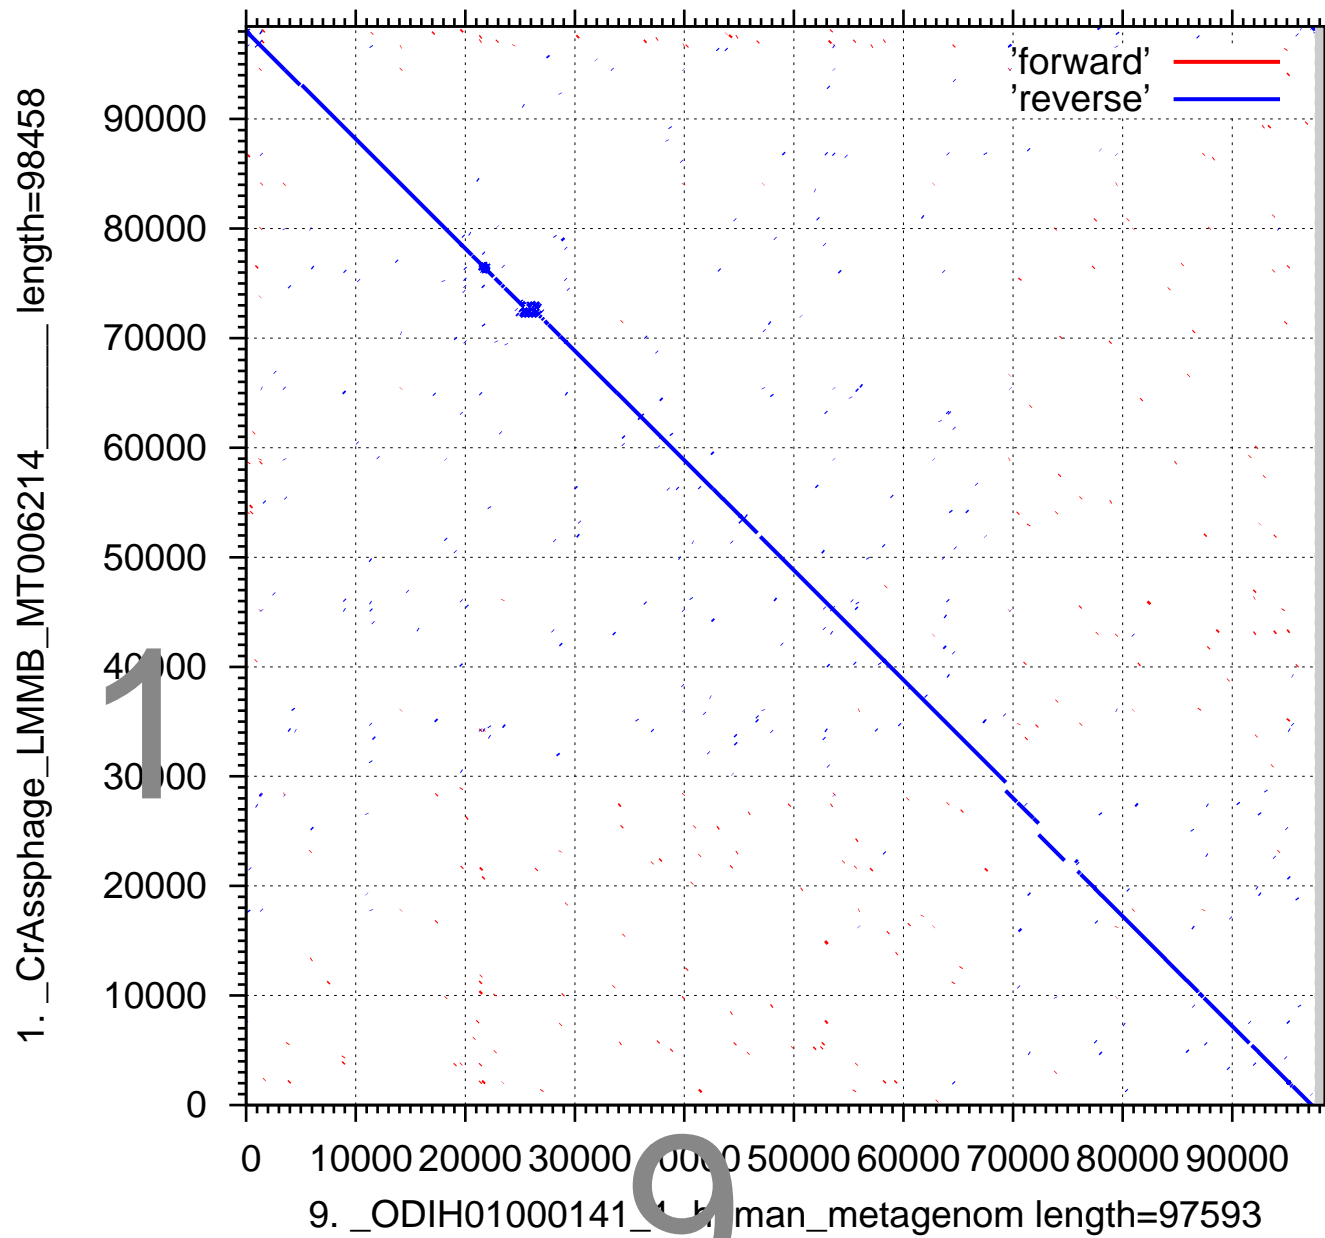

Threshold = 39

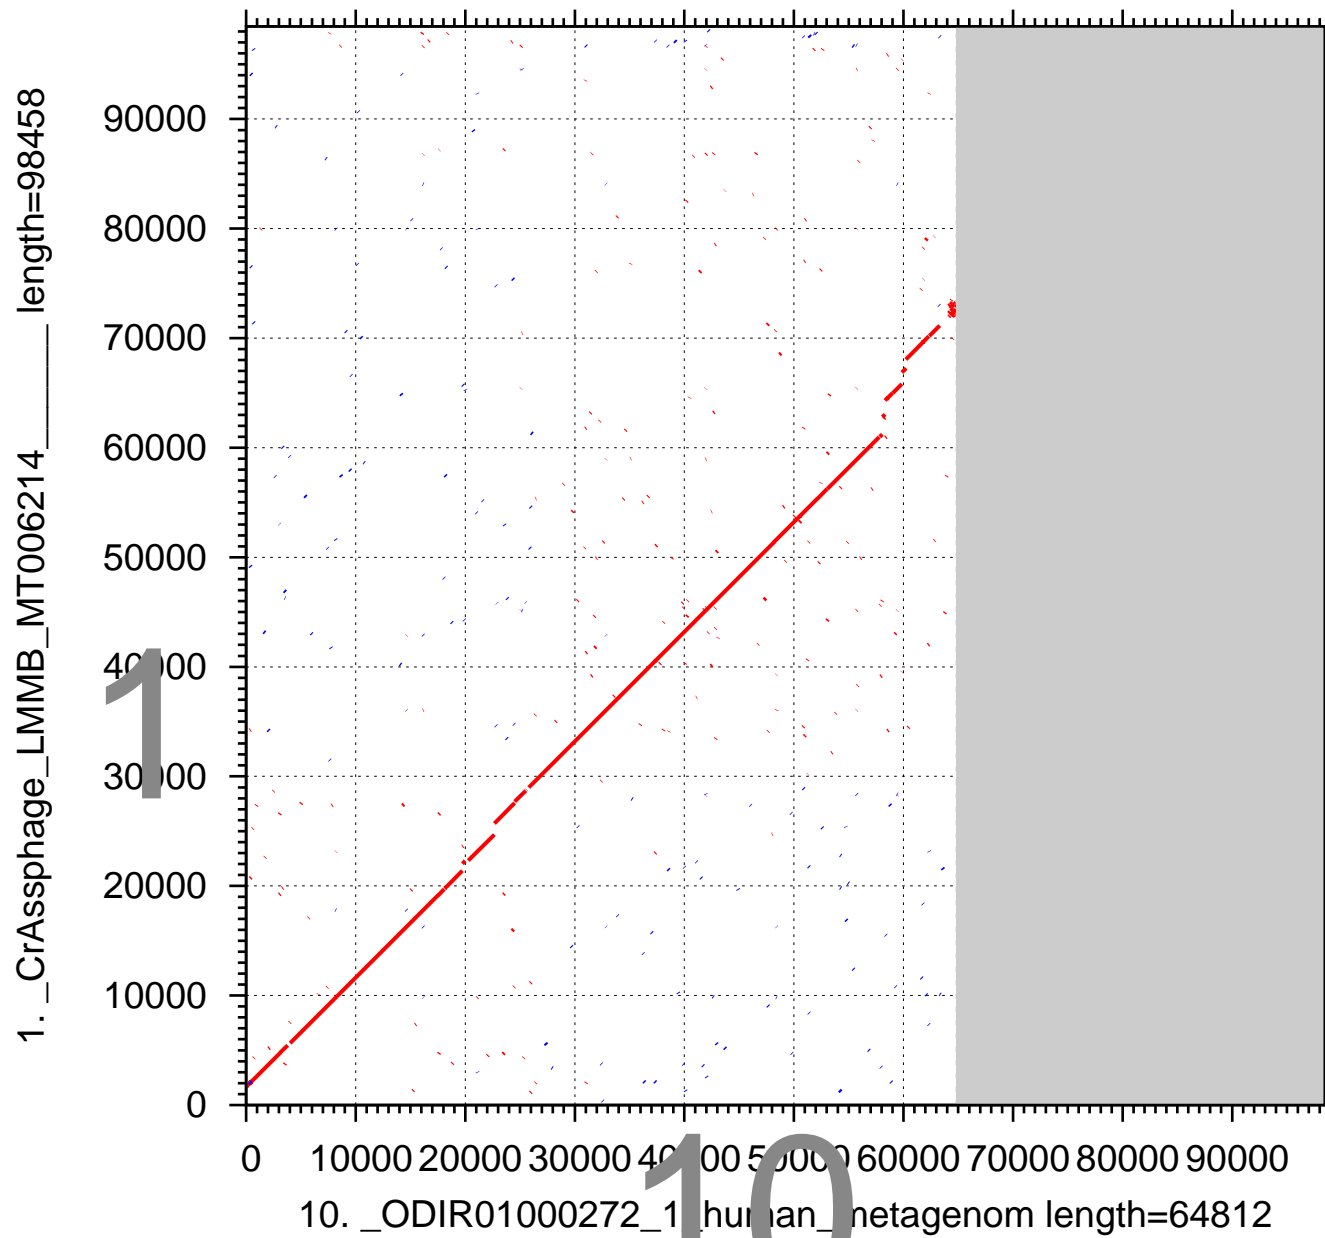

Threshold = 39

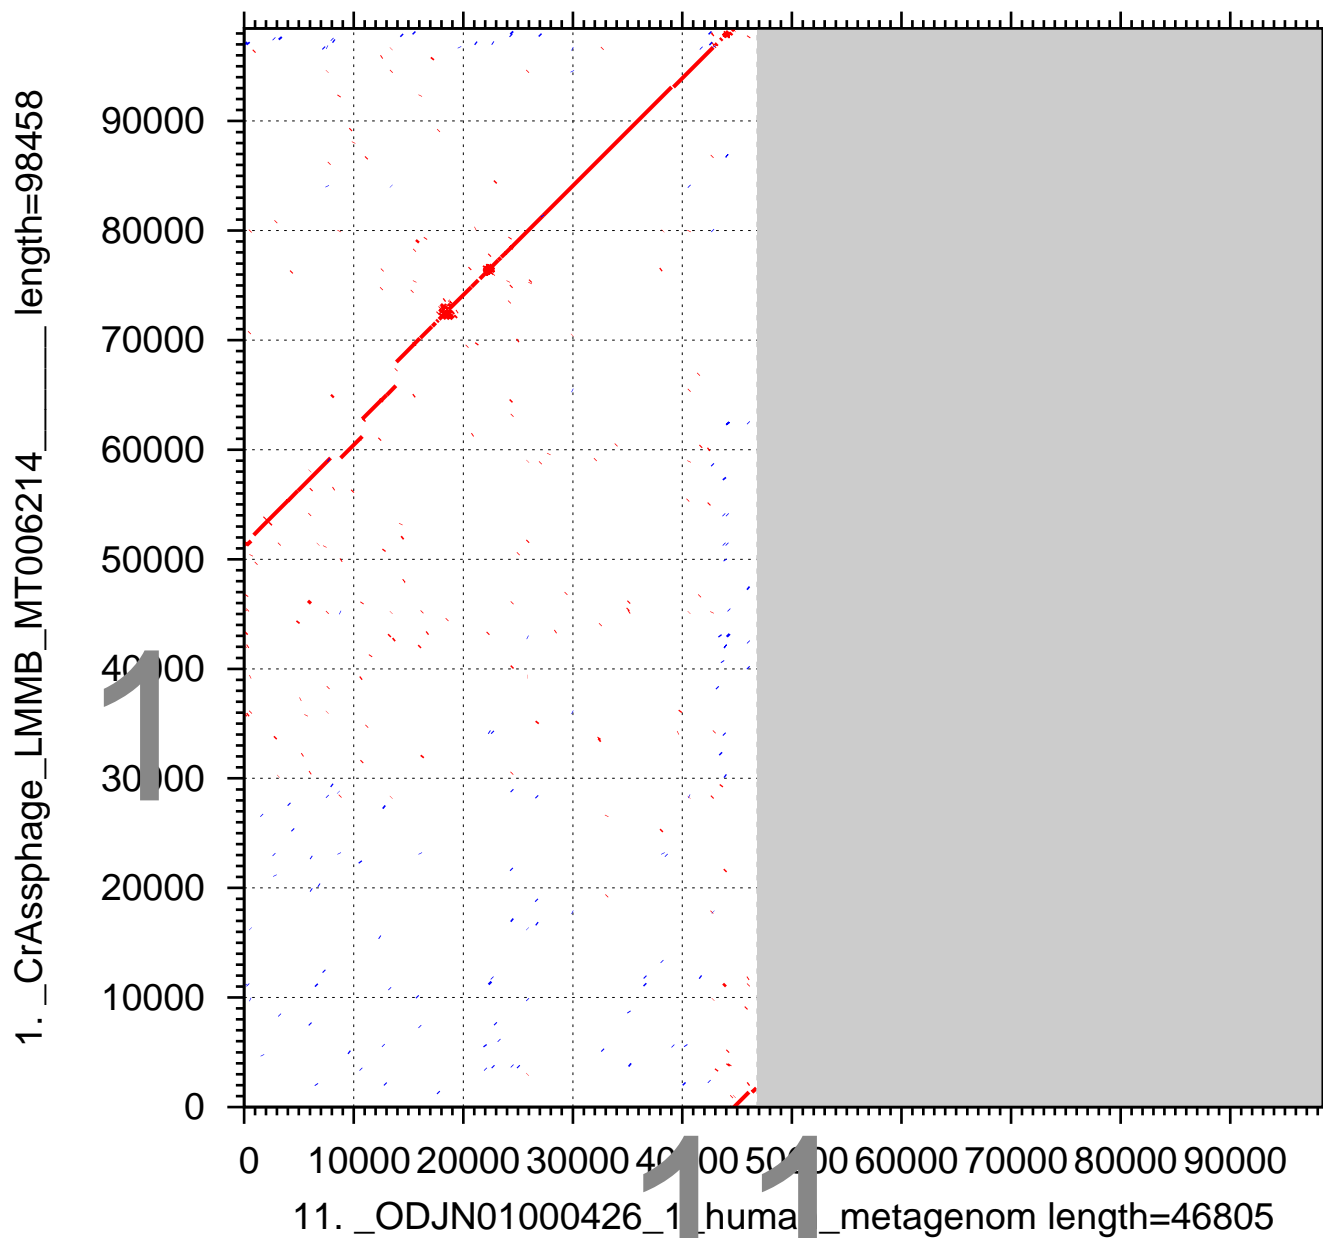

Threshold = 39

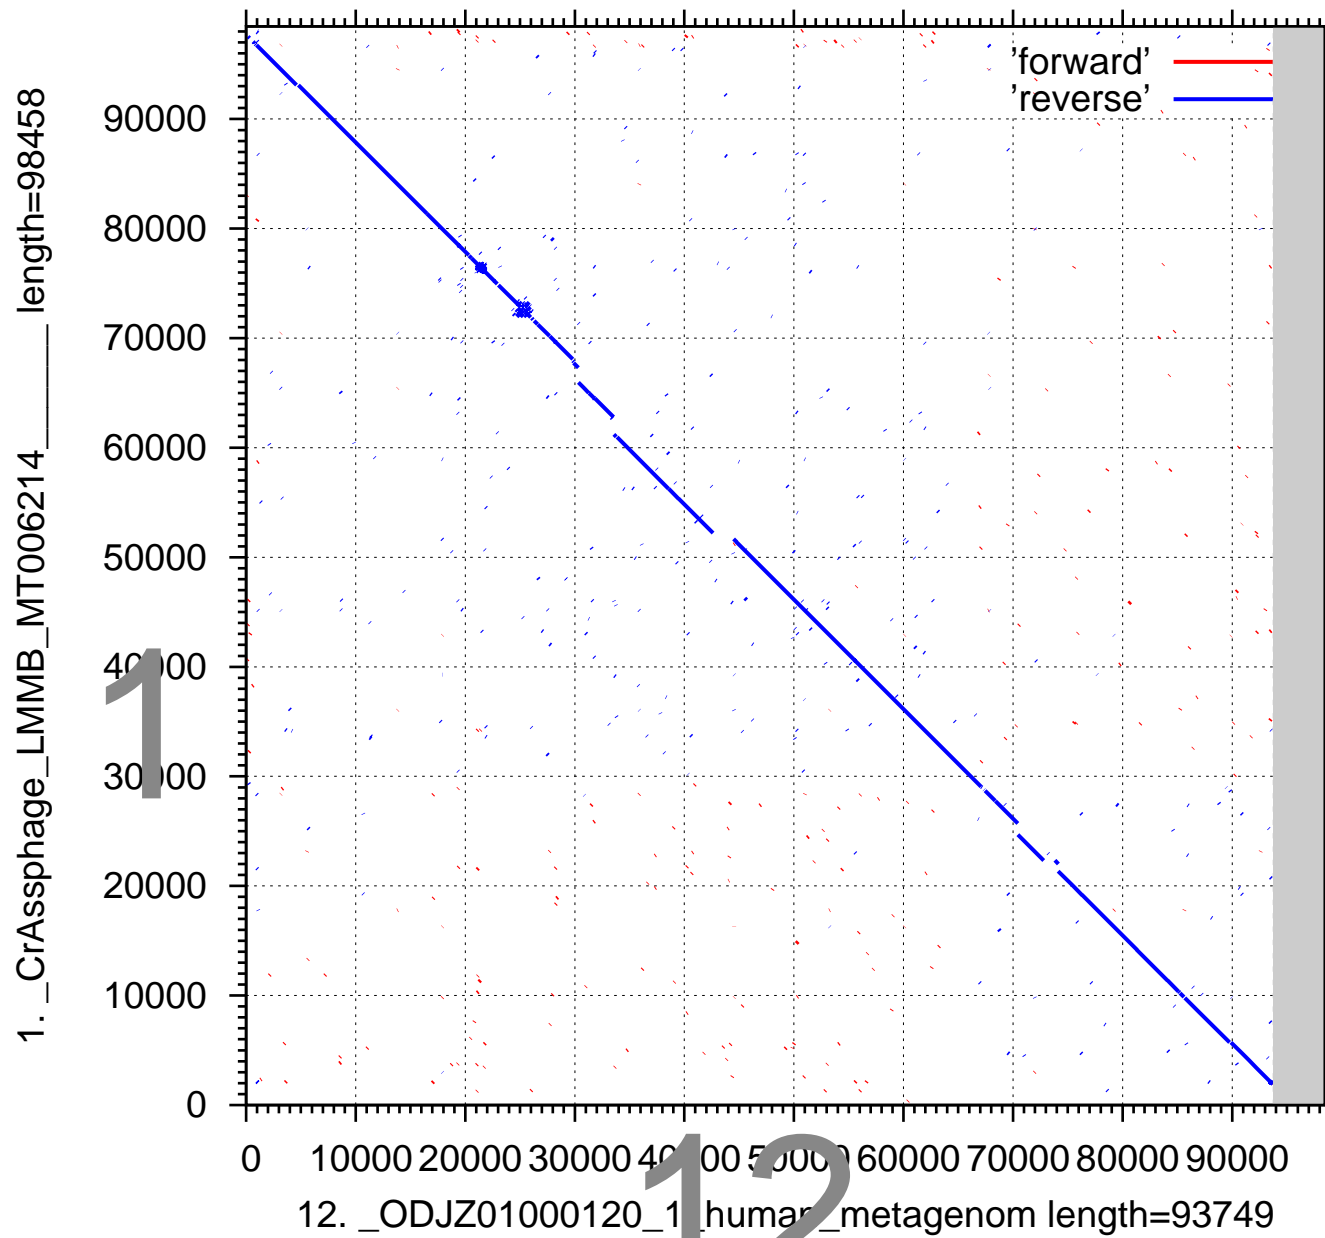

Threshold = 39

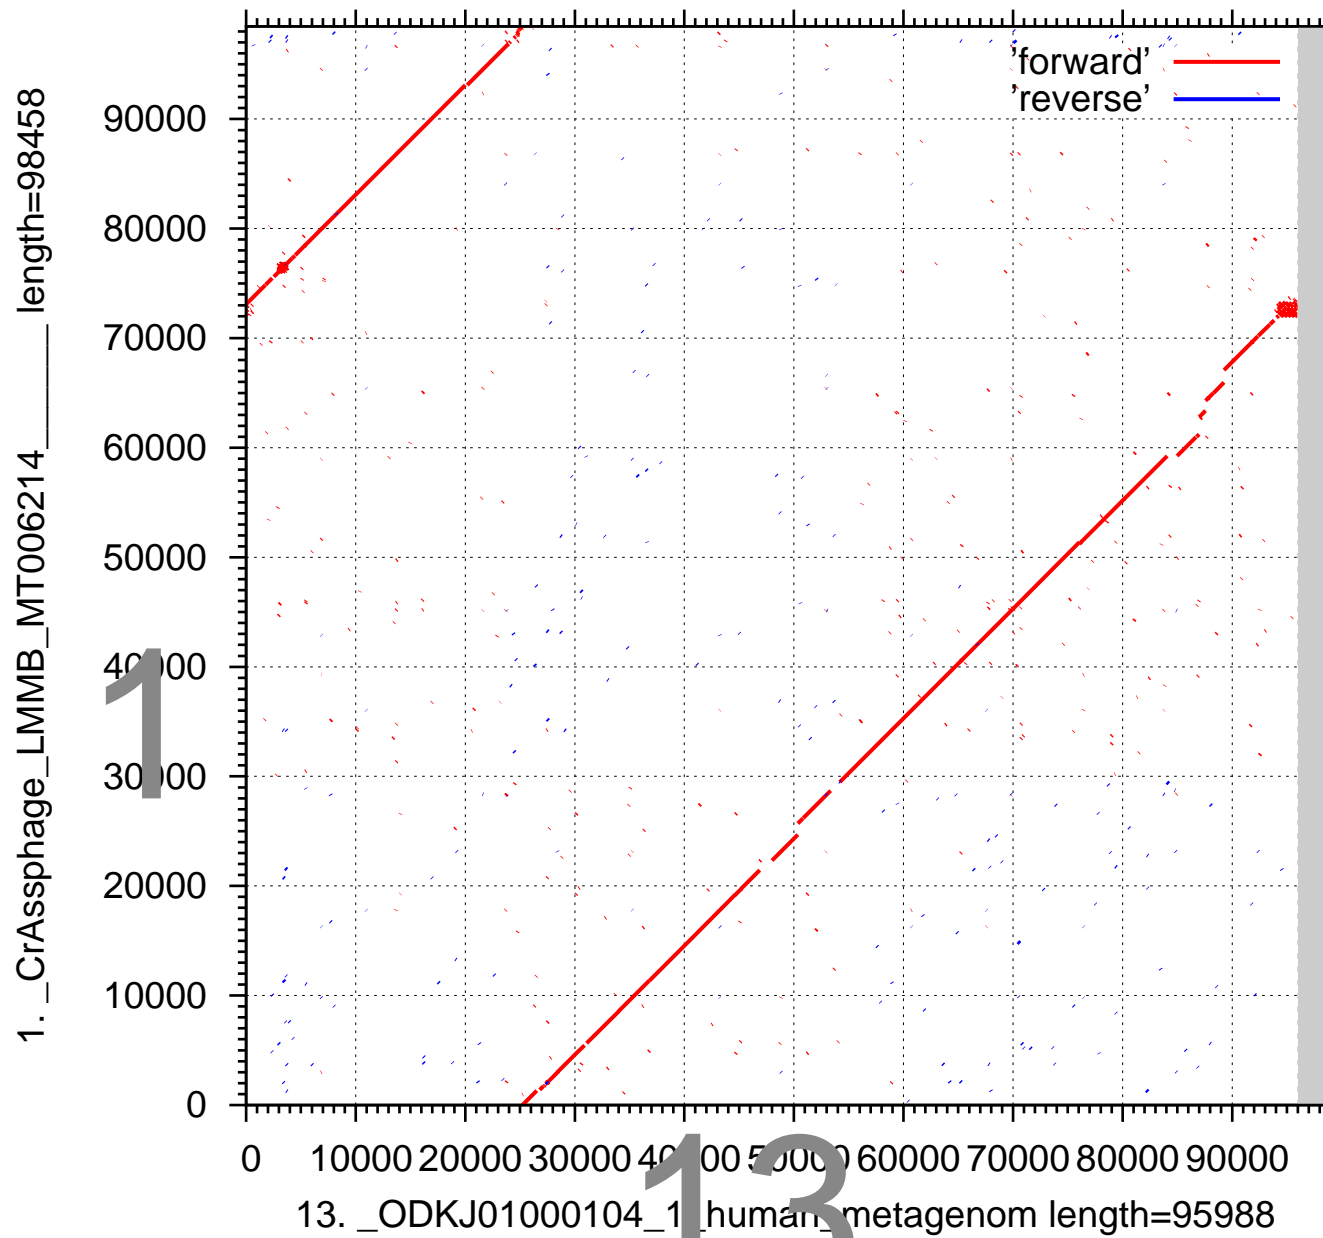

Threshold = 39

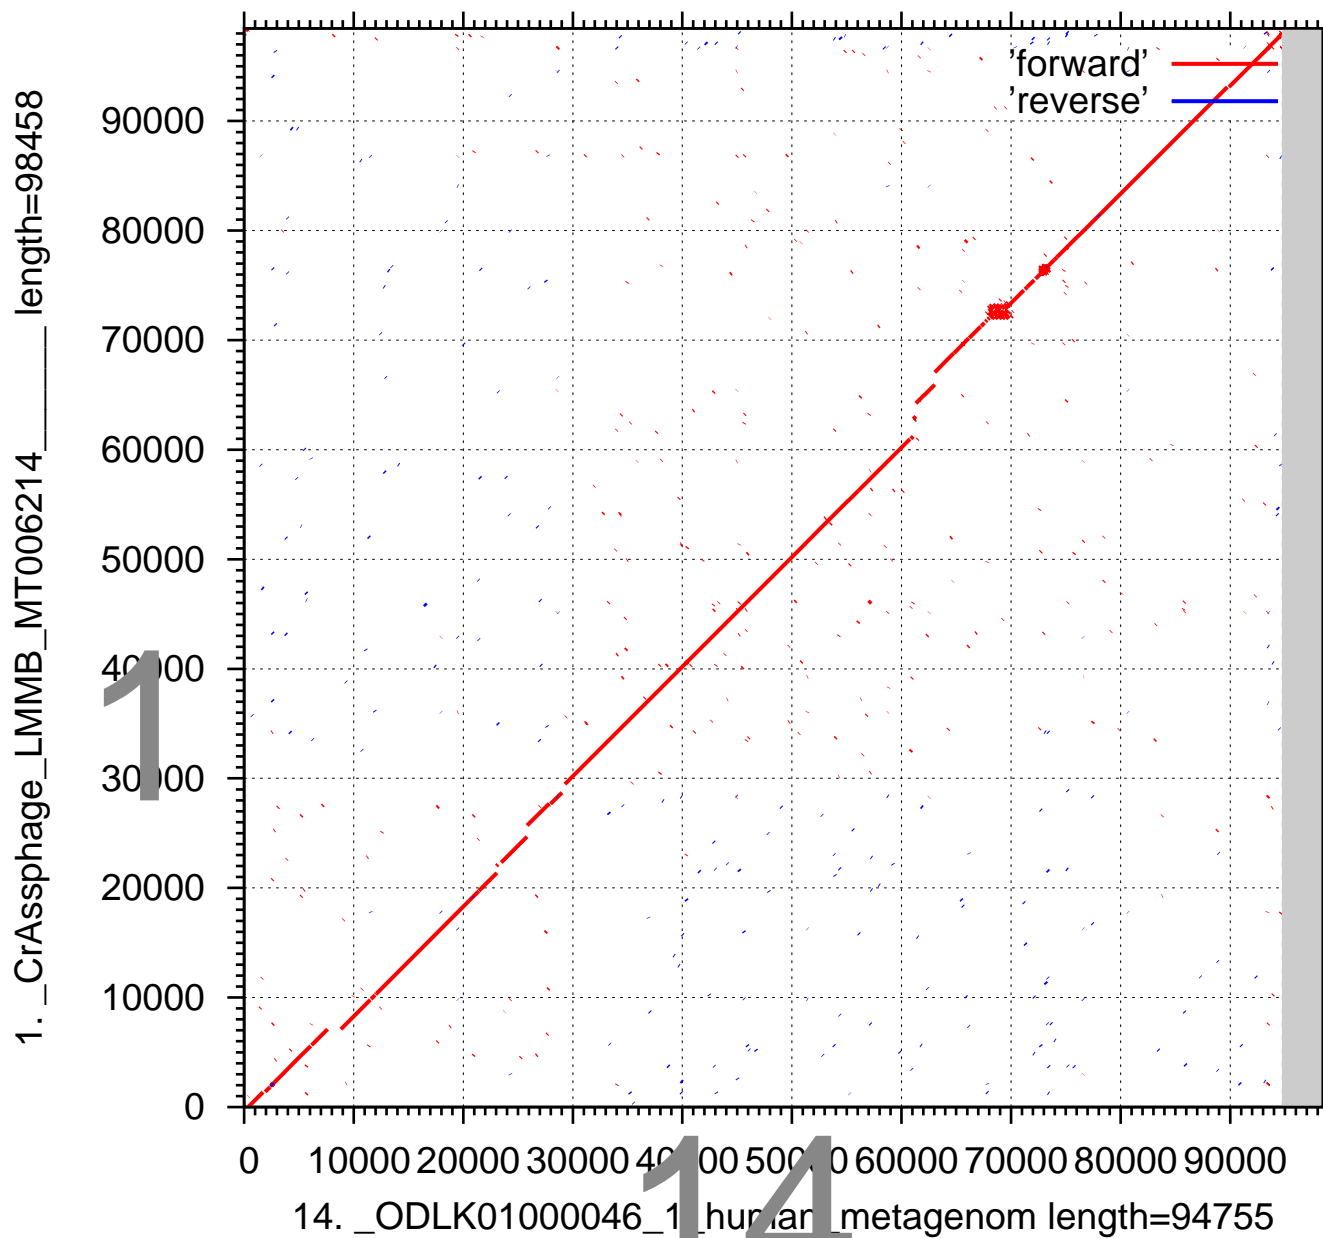

Threshold = 39

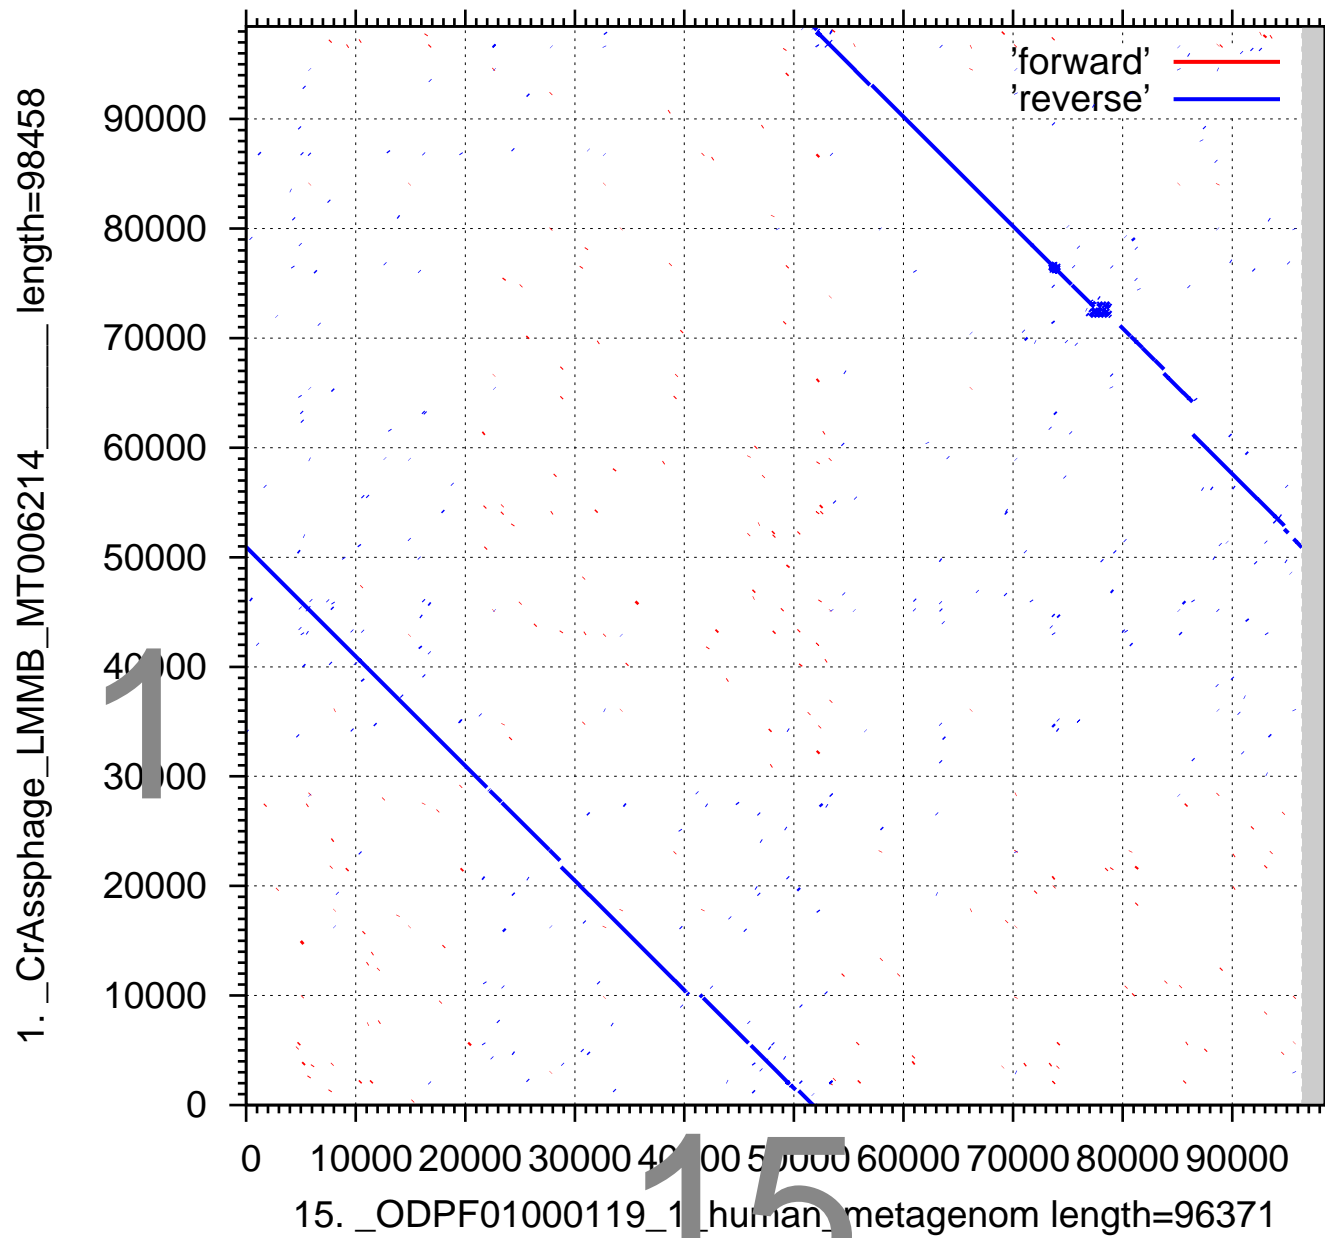

Threshold = 39

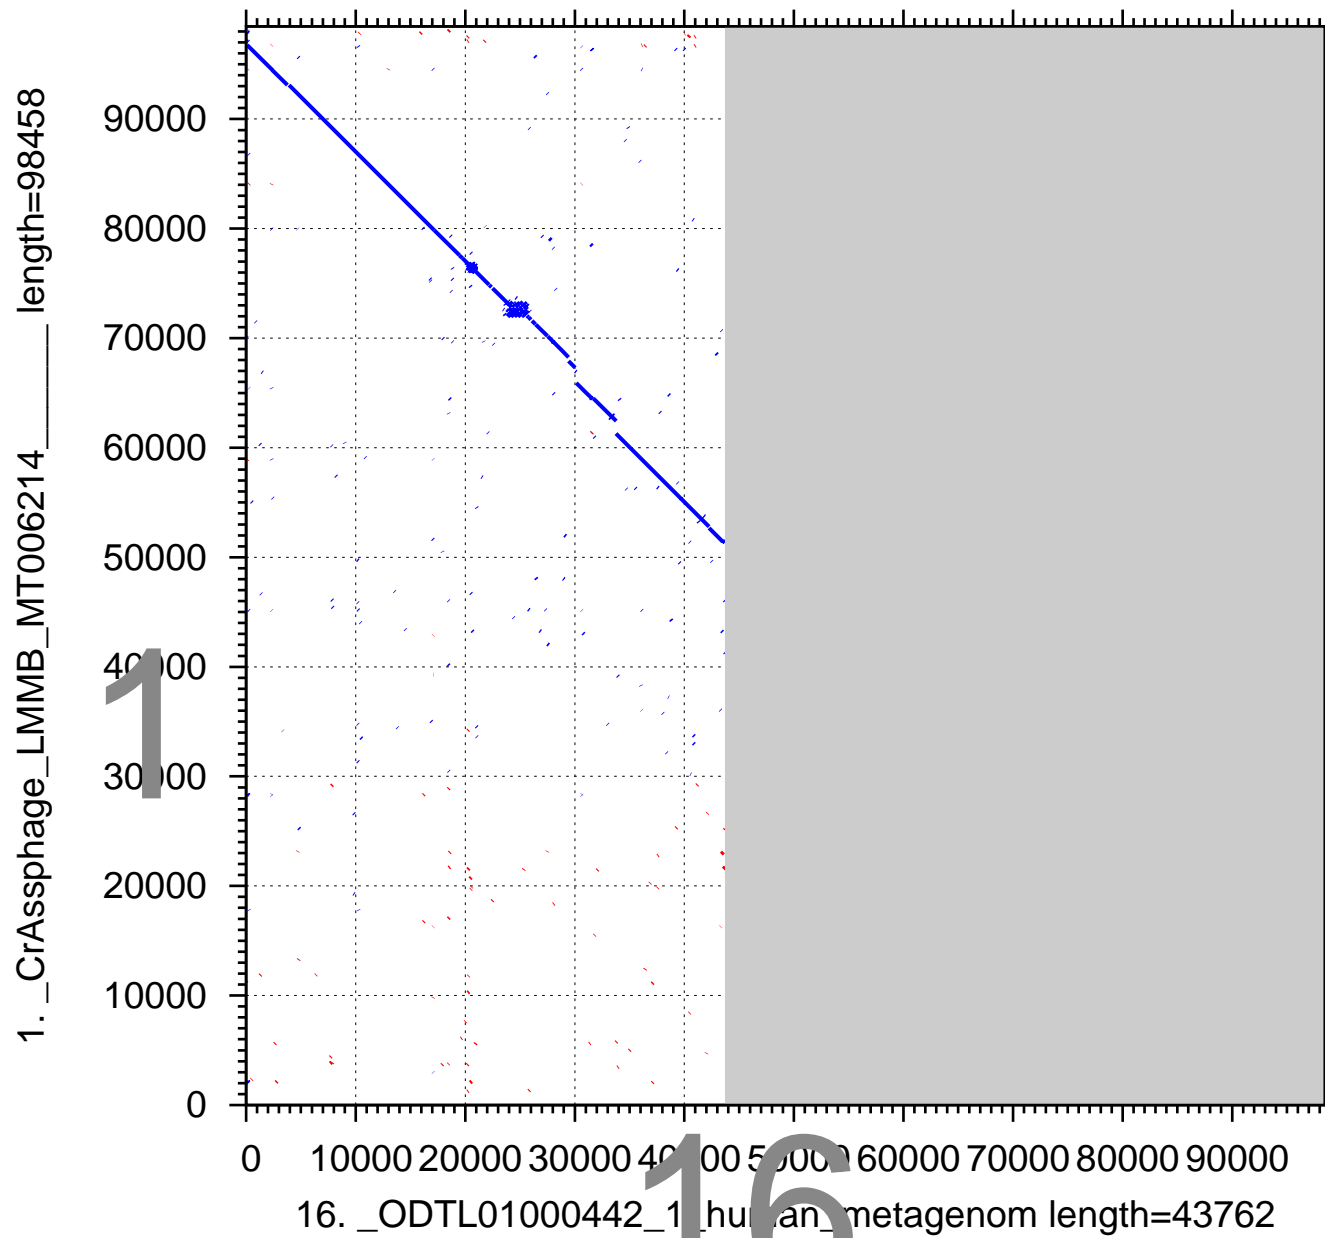

Threshold = 39

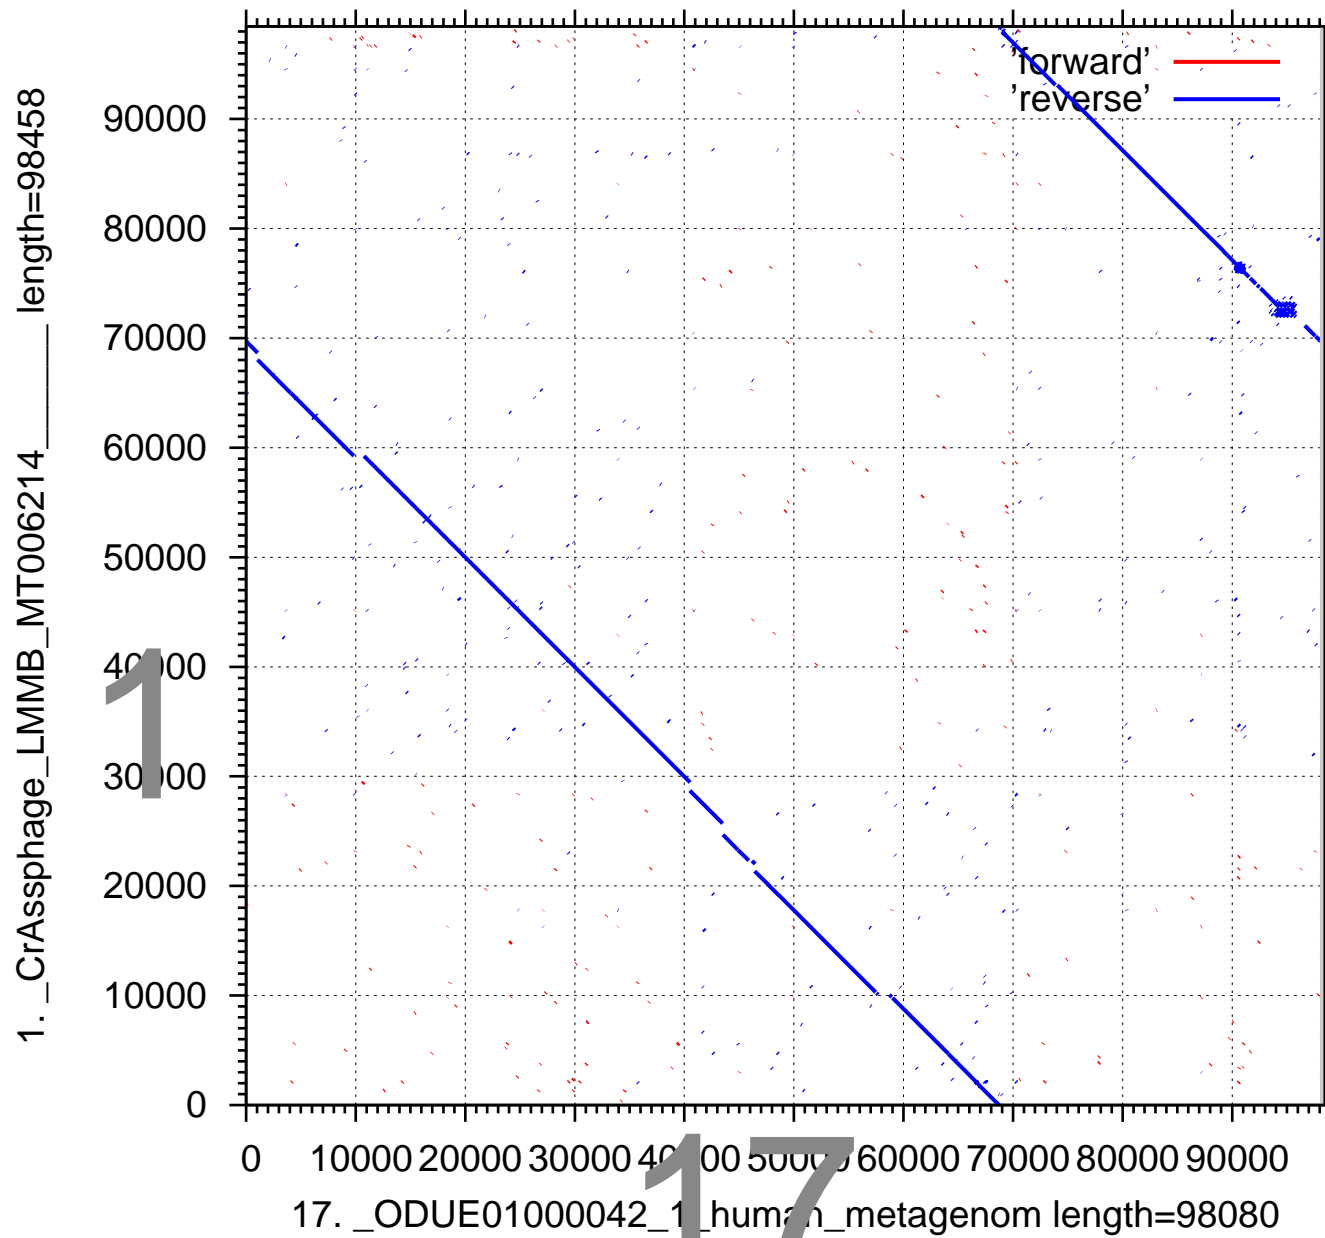

Threshold = 39

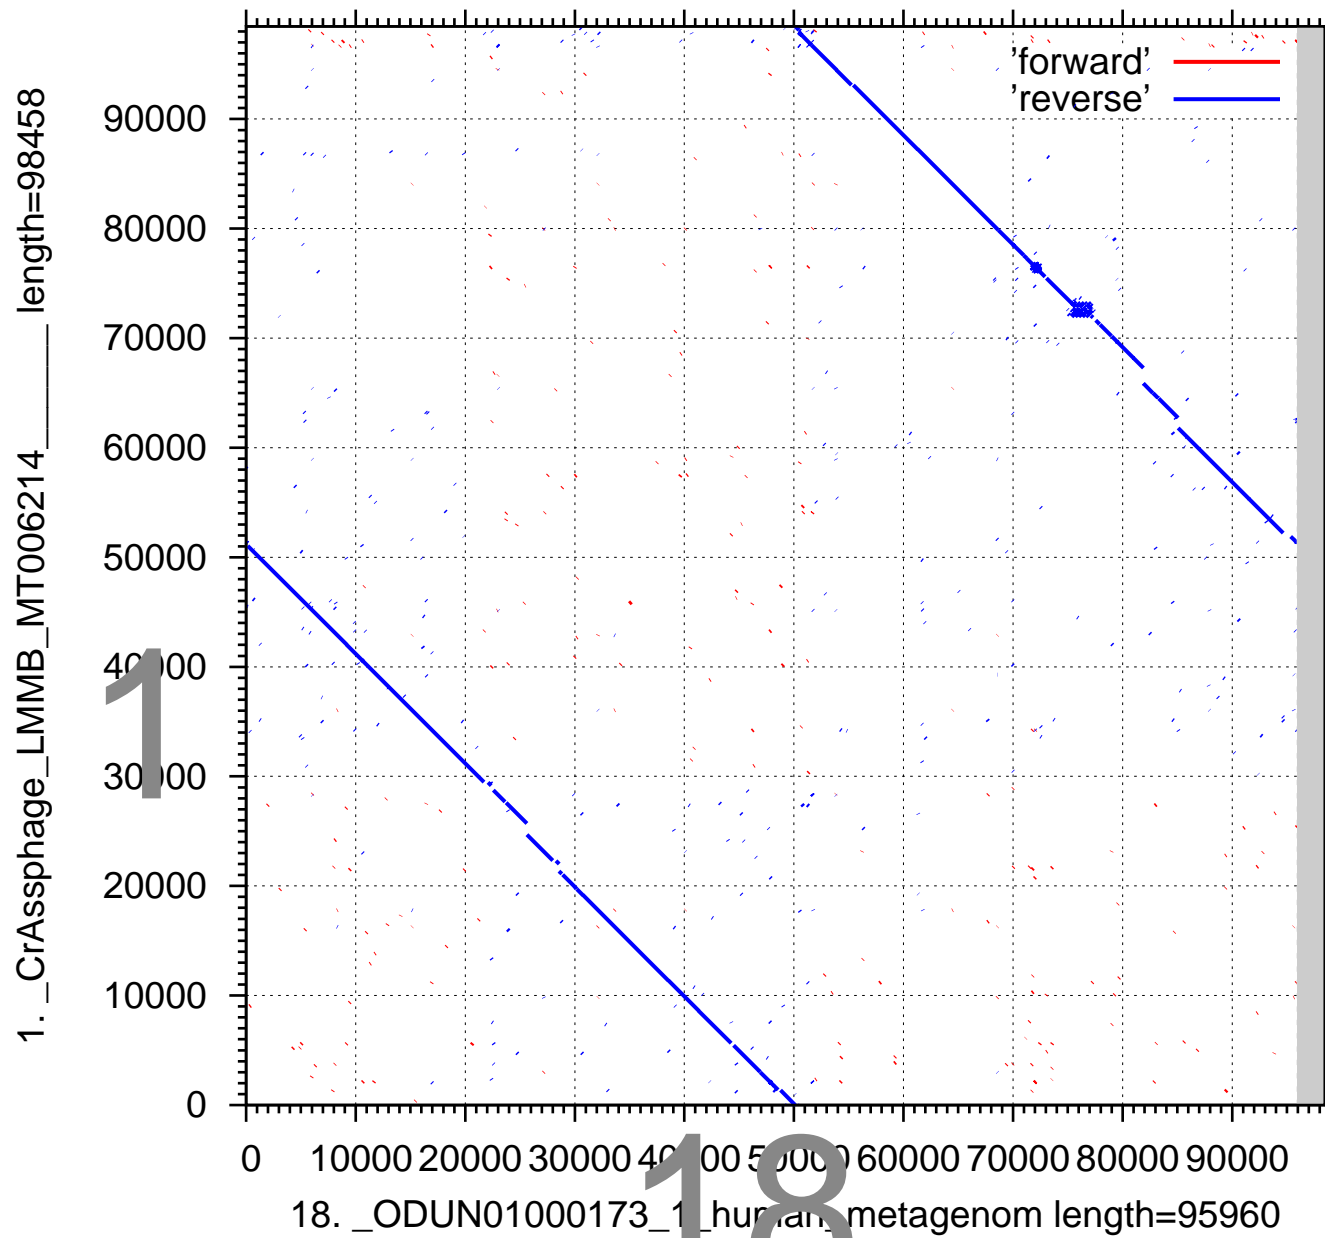

Threshold = 39

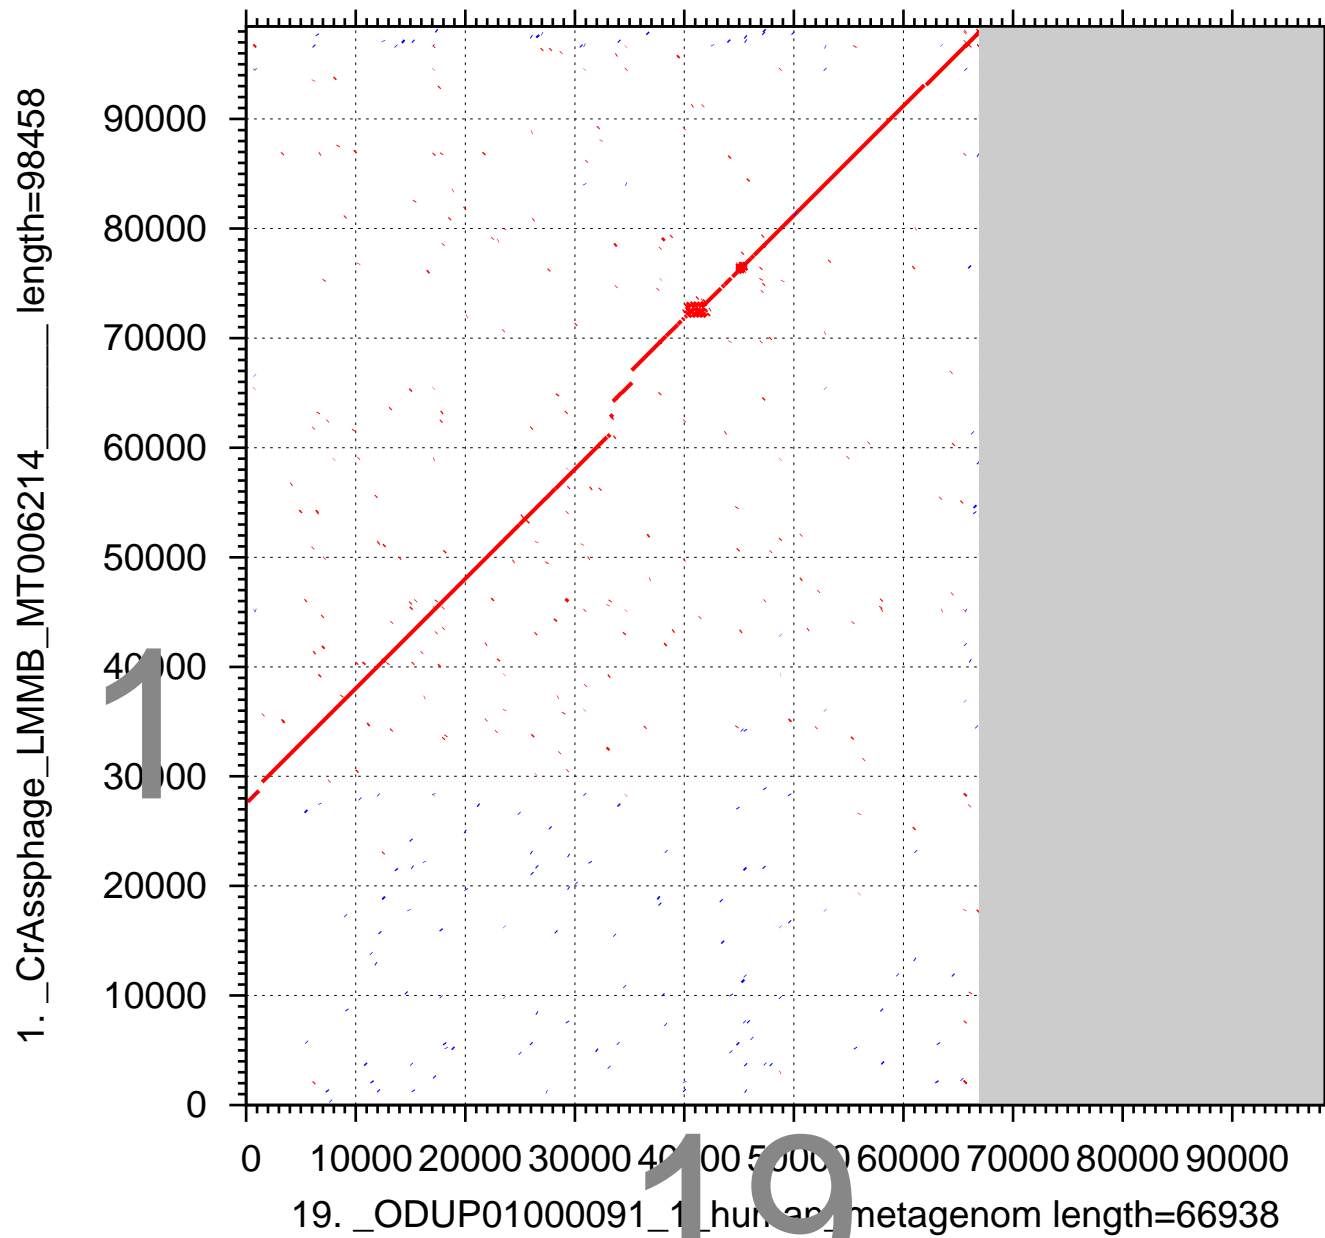

Threshold = 39

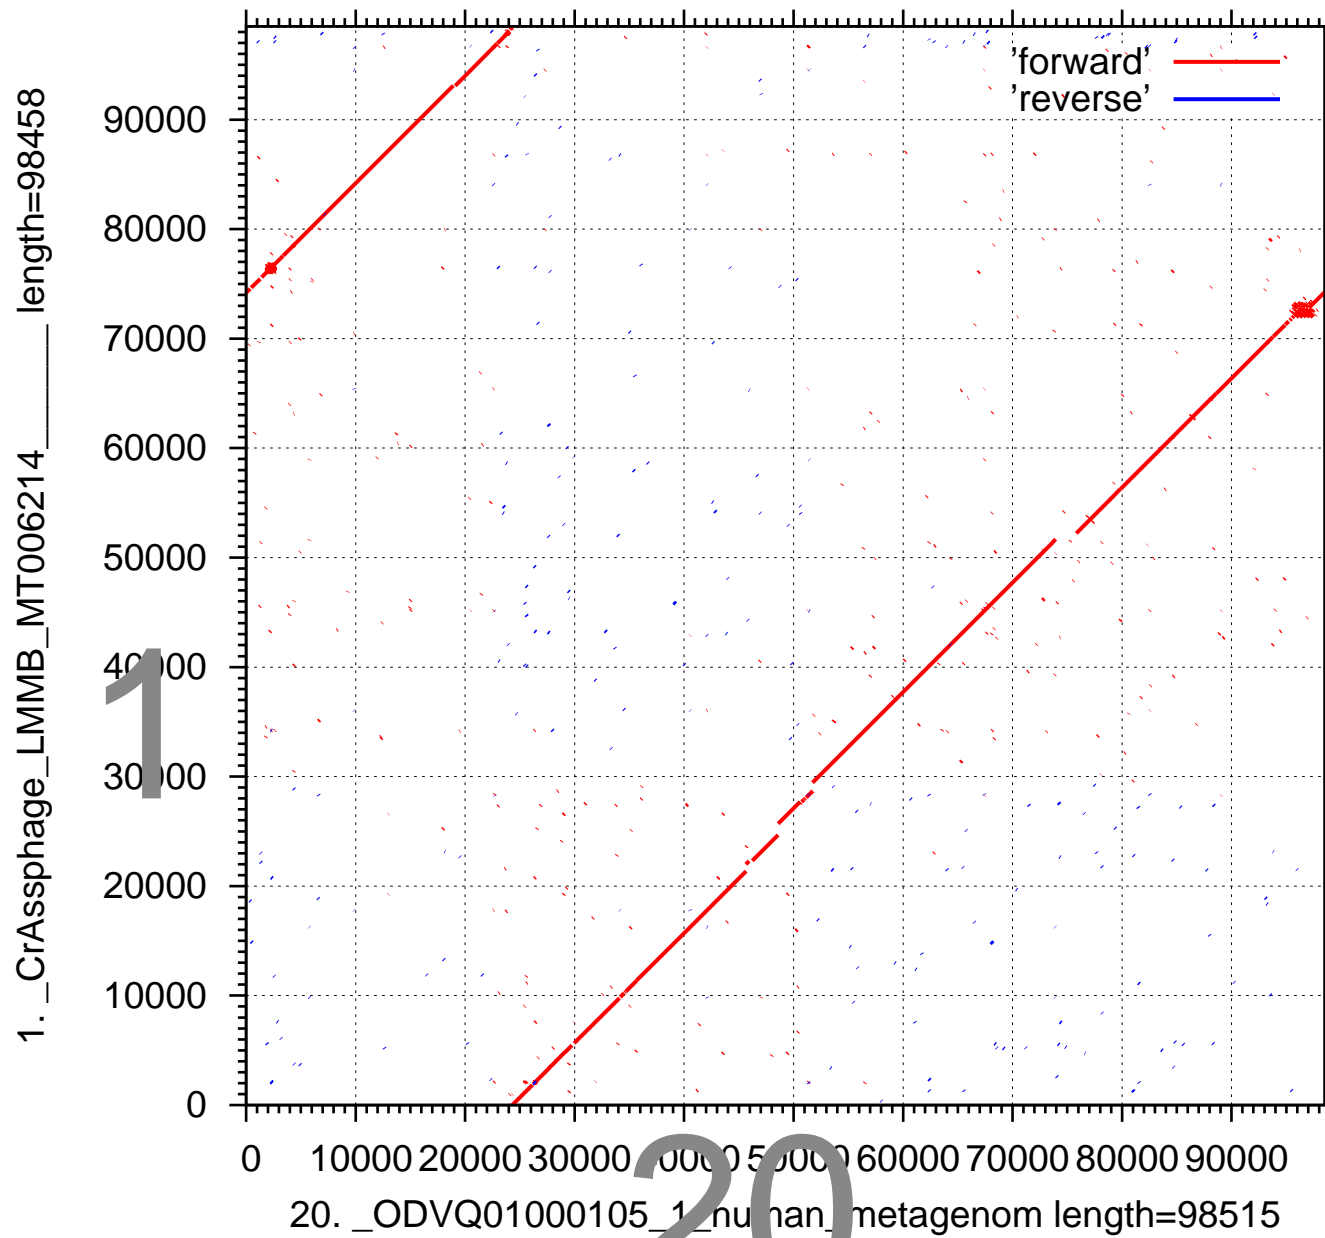

Threshold = 39

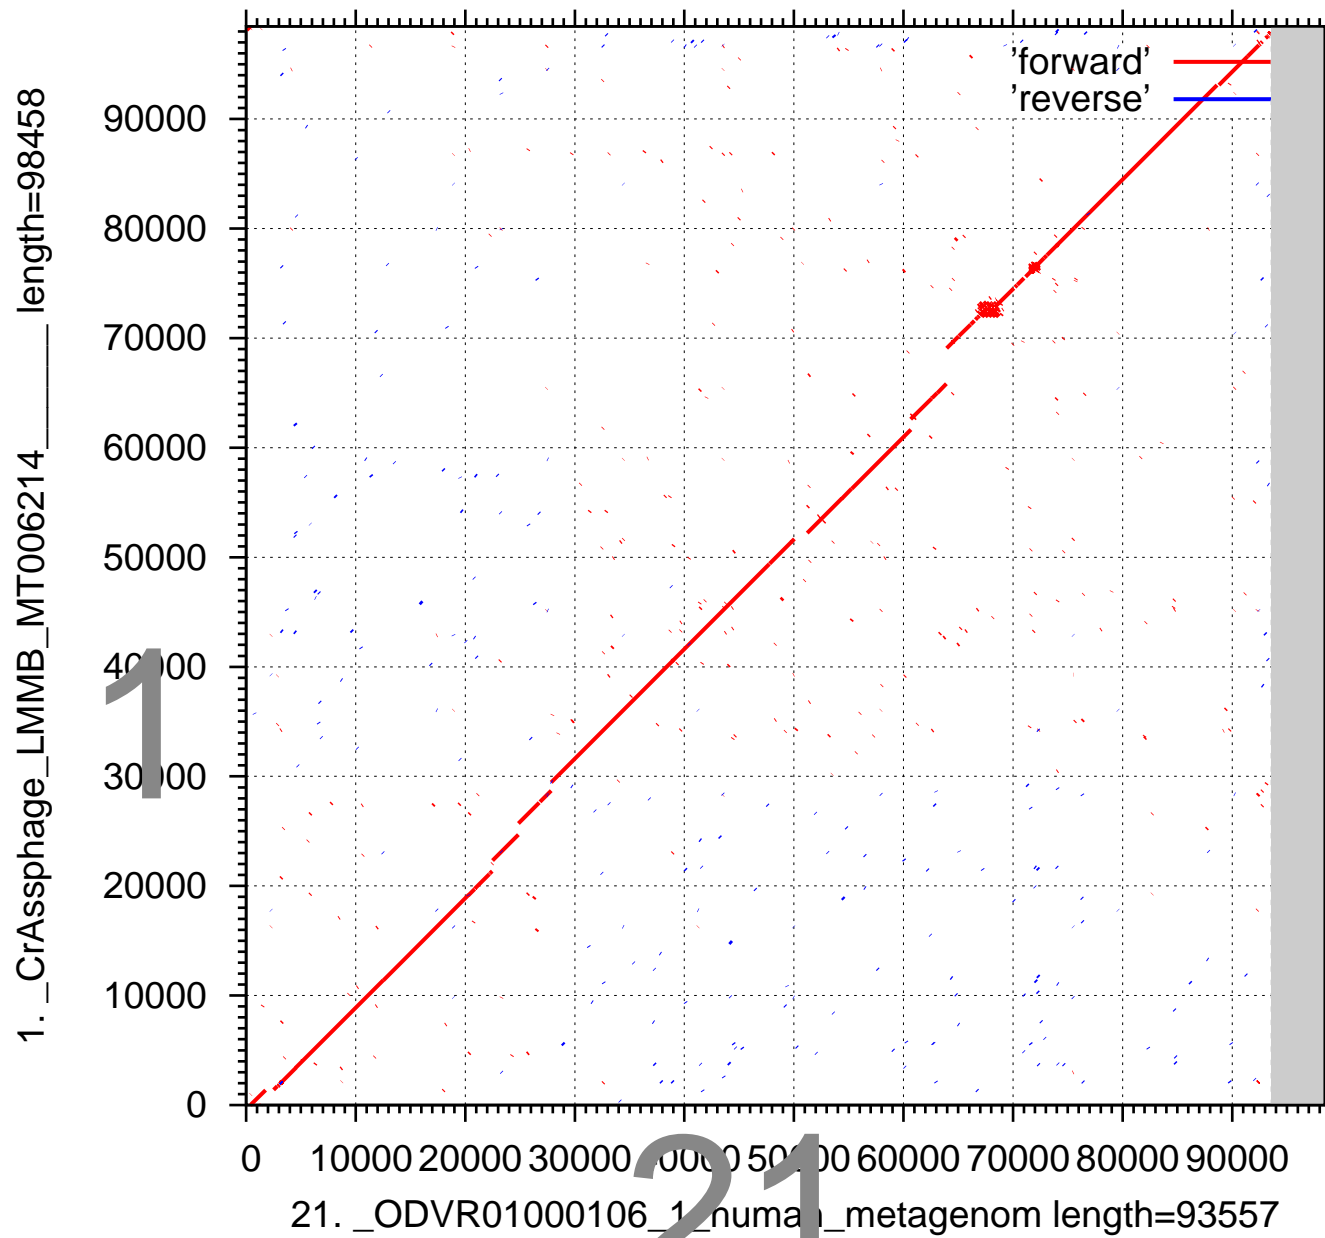

Threshold = 39

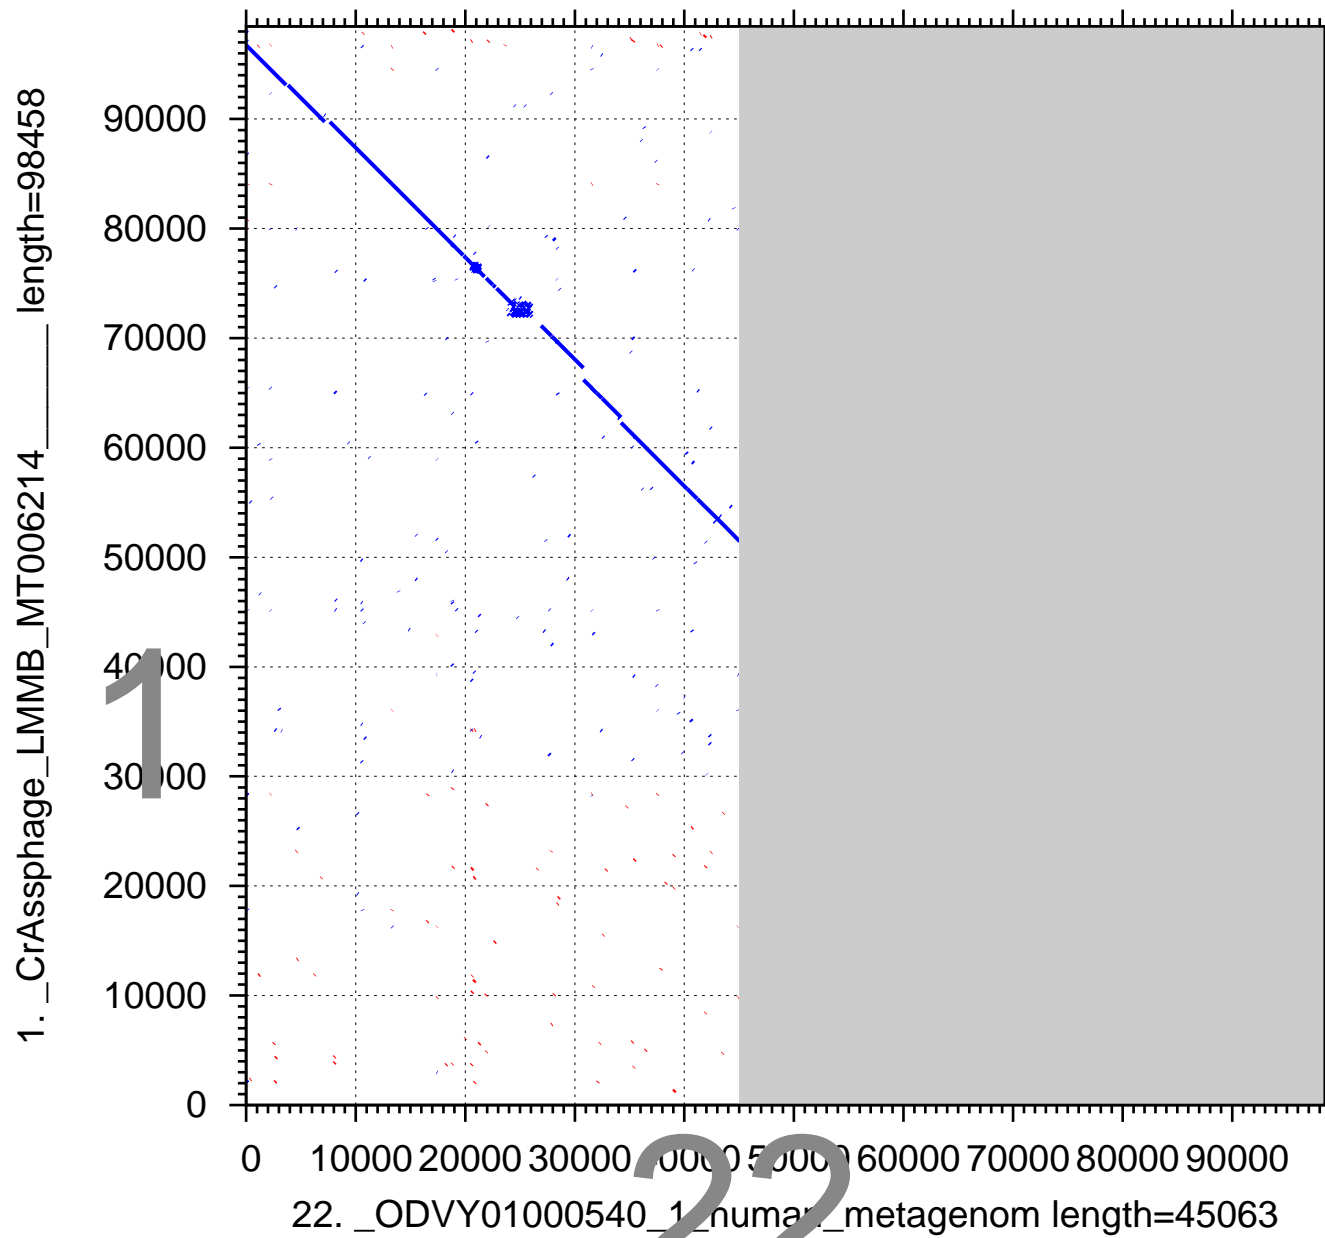

Threshold = 39

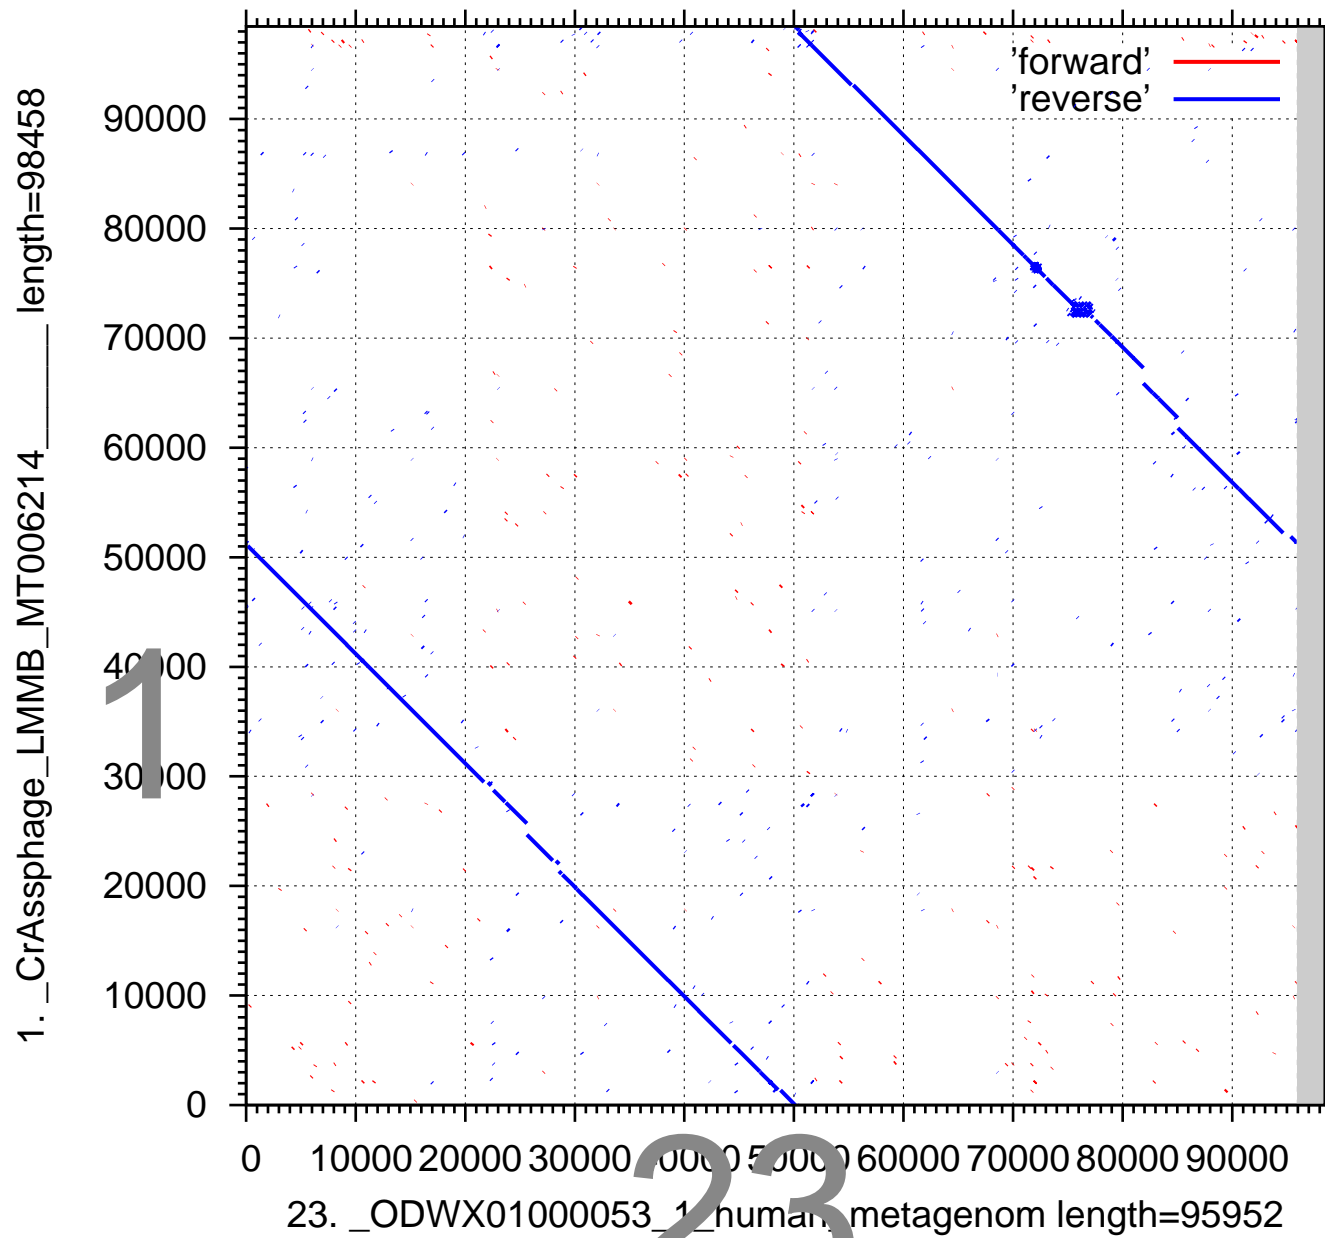

Threshold = 39

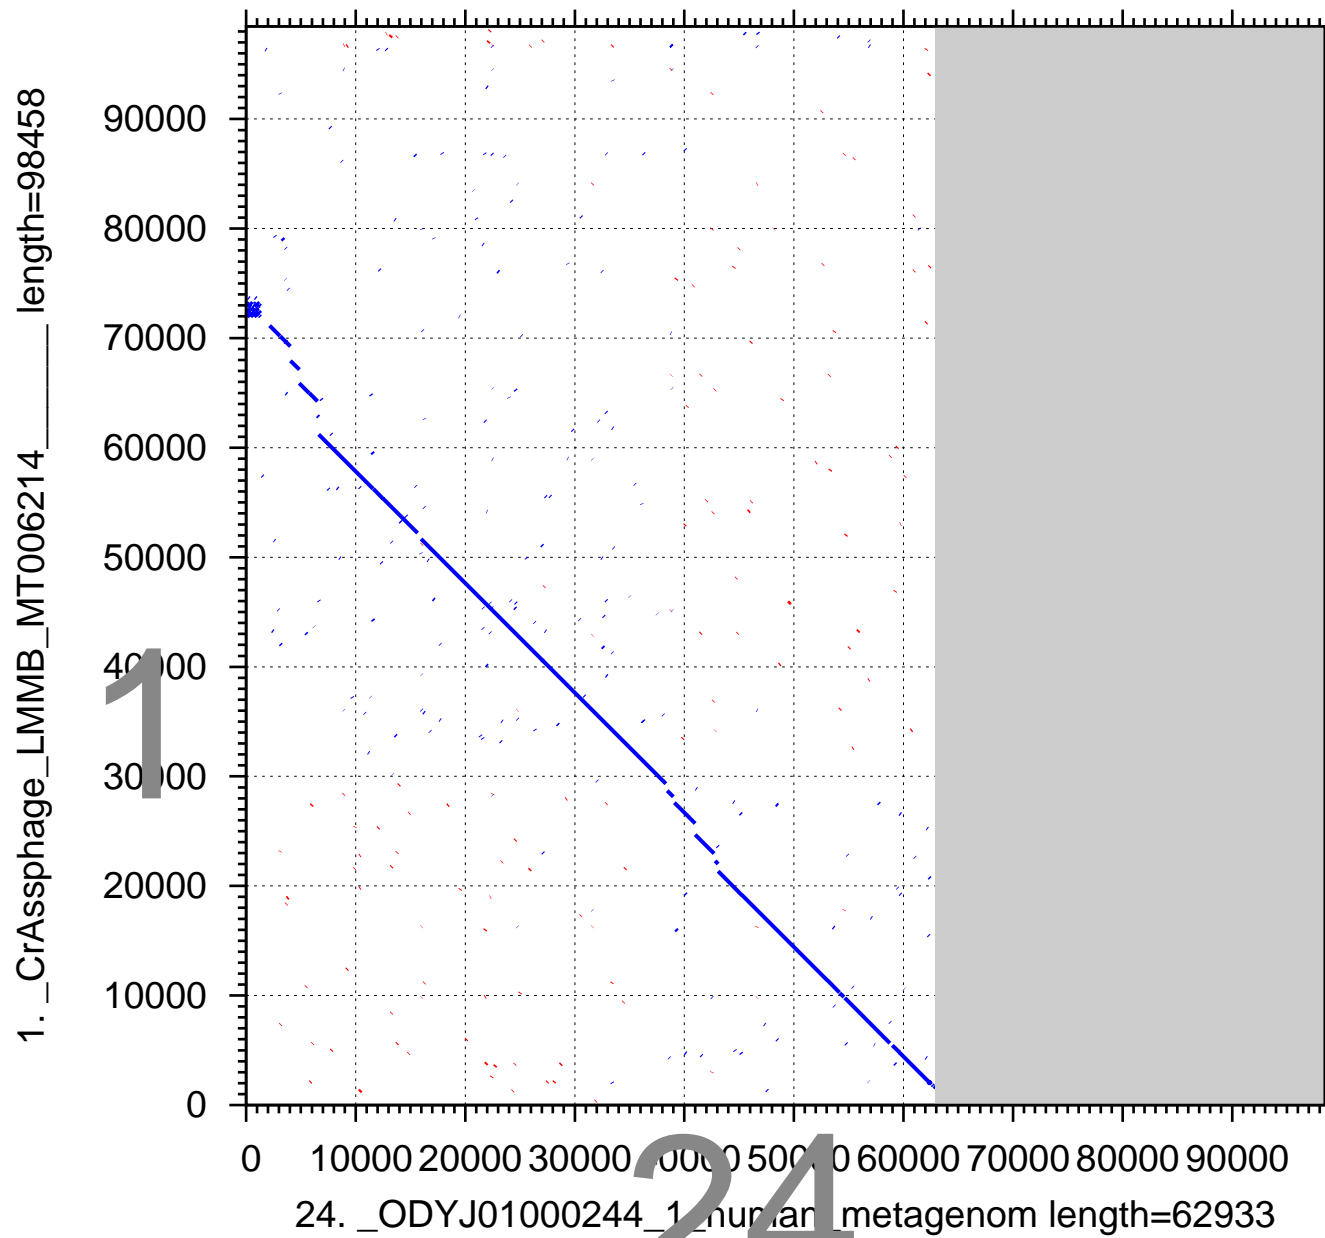

Threshold = 39

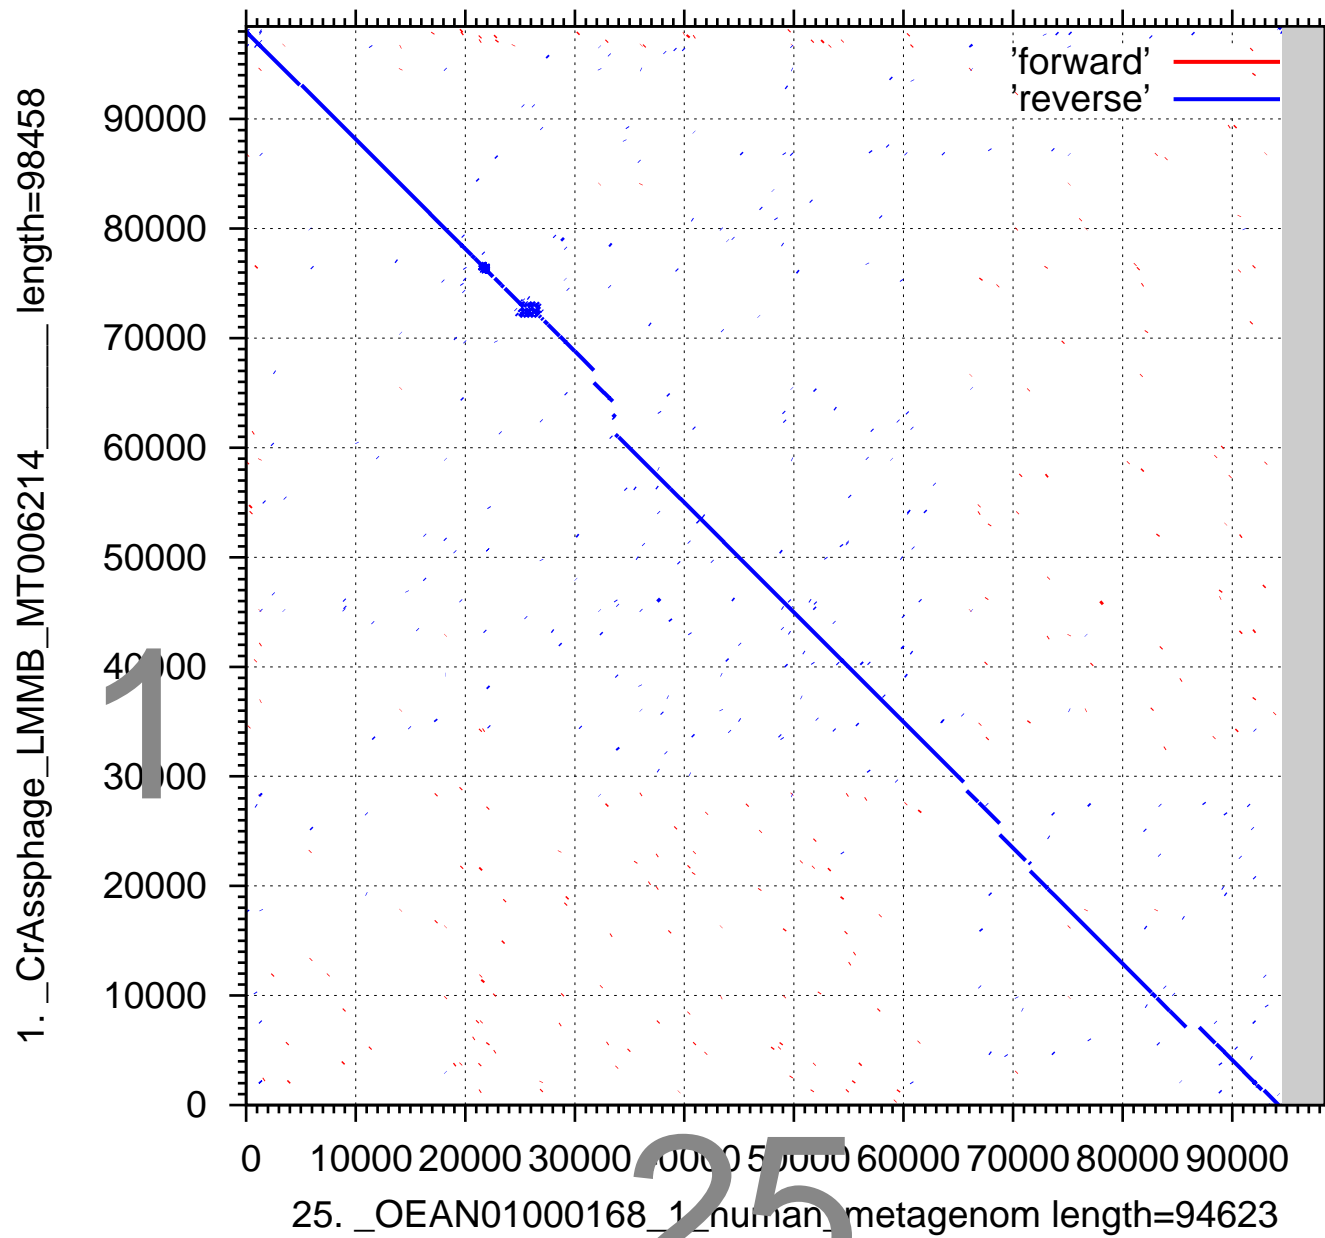

Threshold = 39

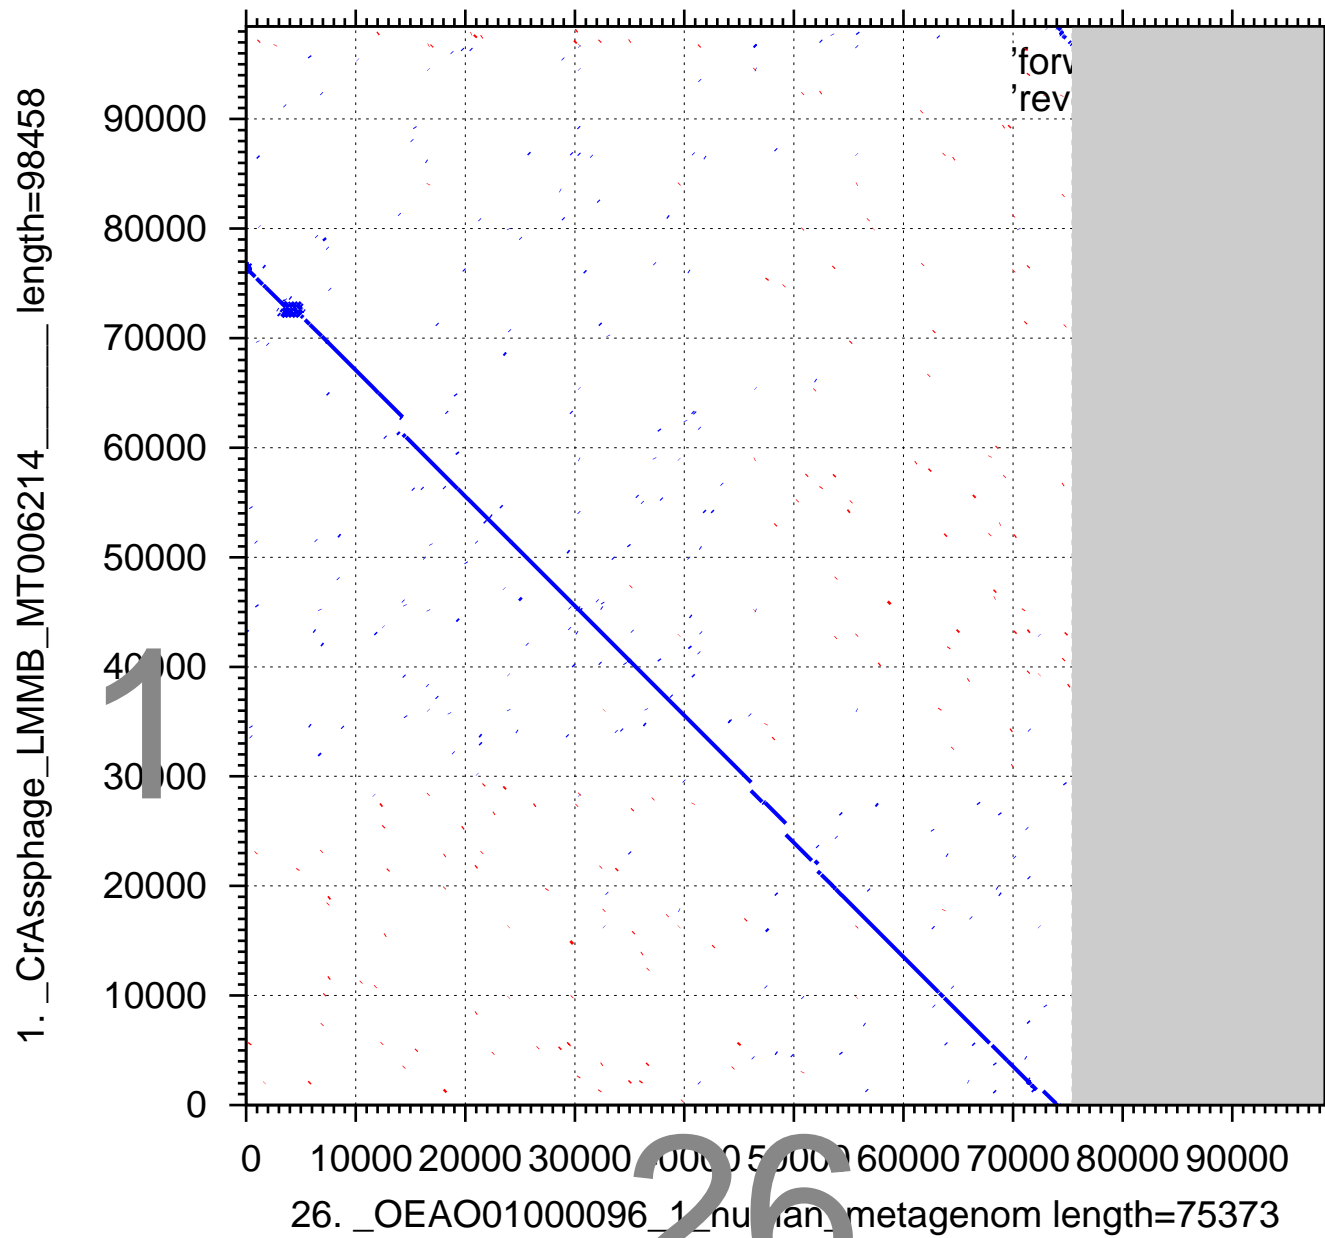

Threshold = 39

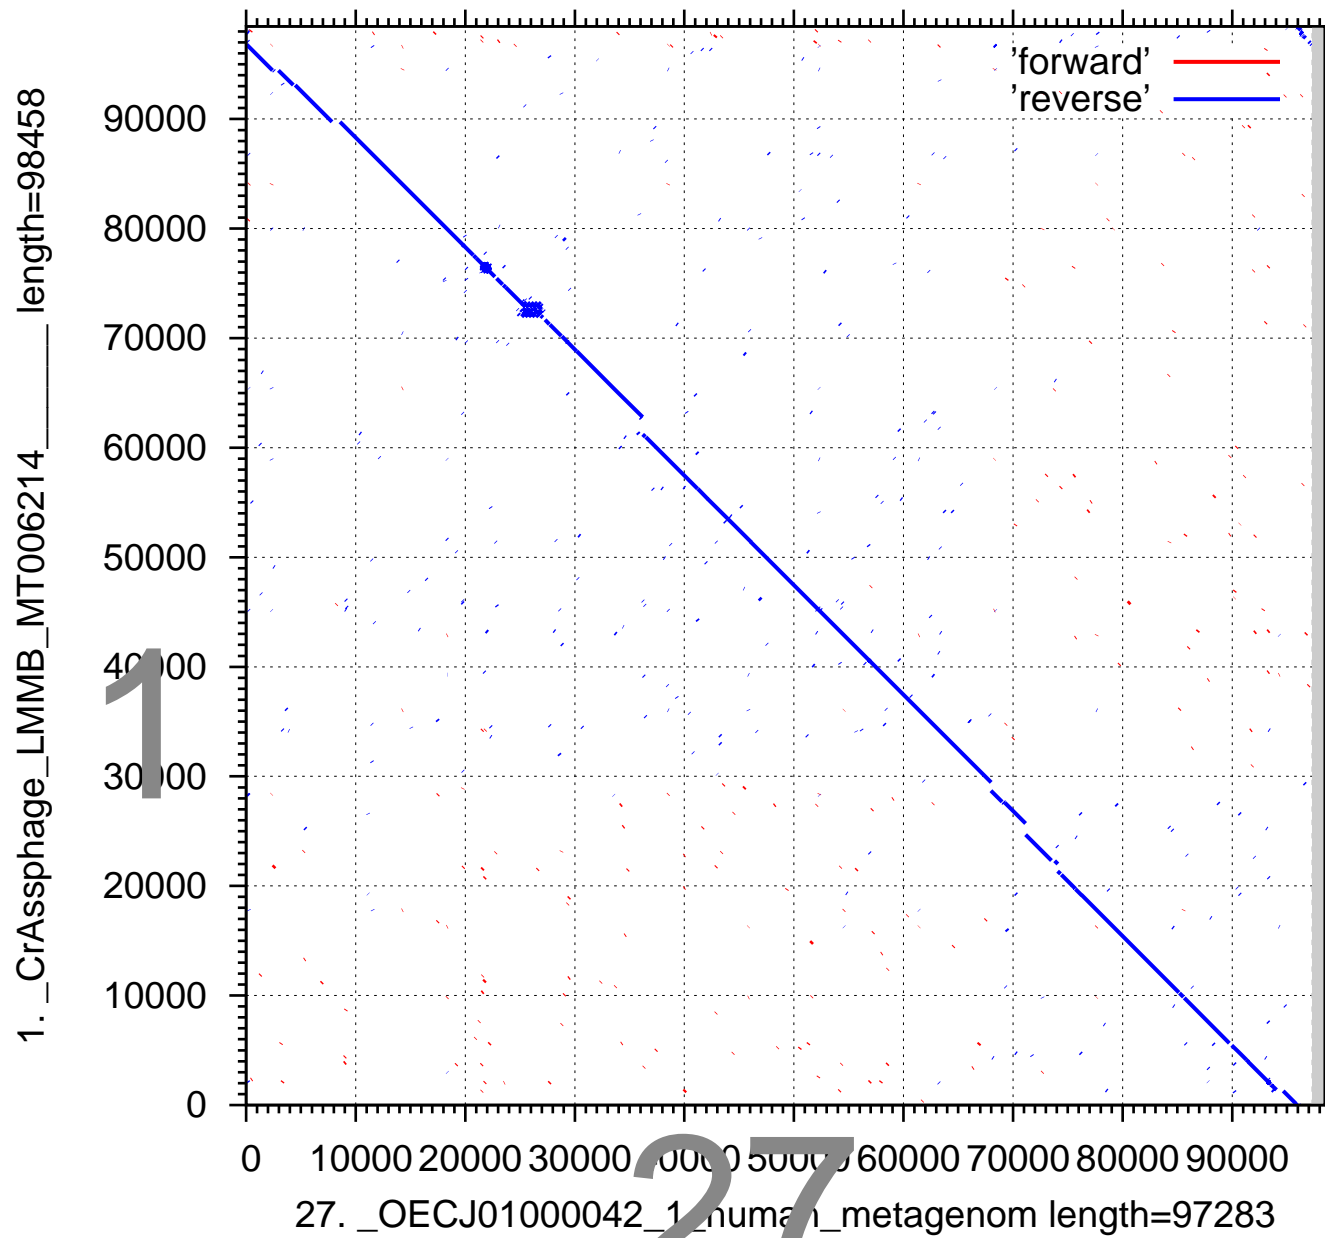

Threshold = 39

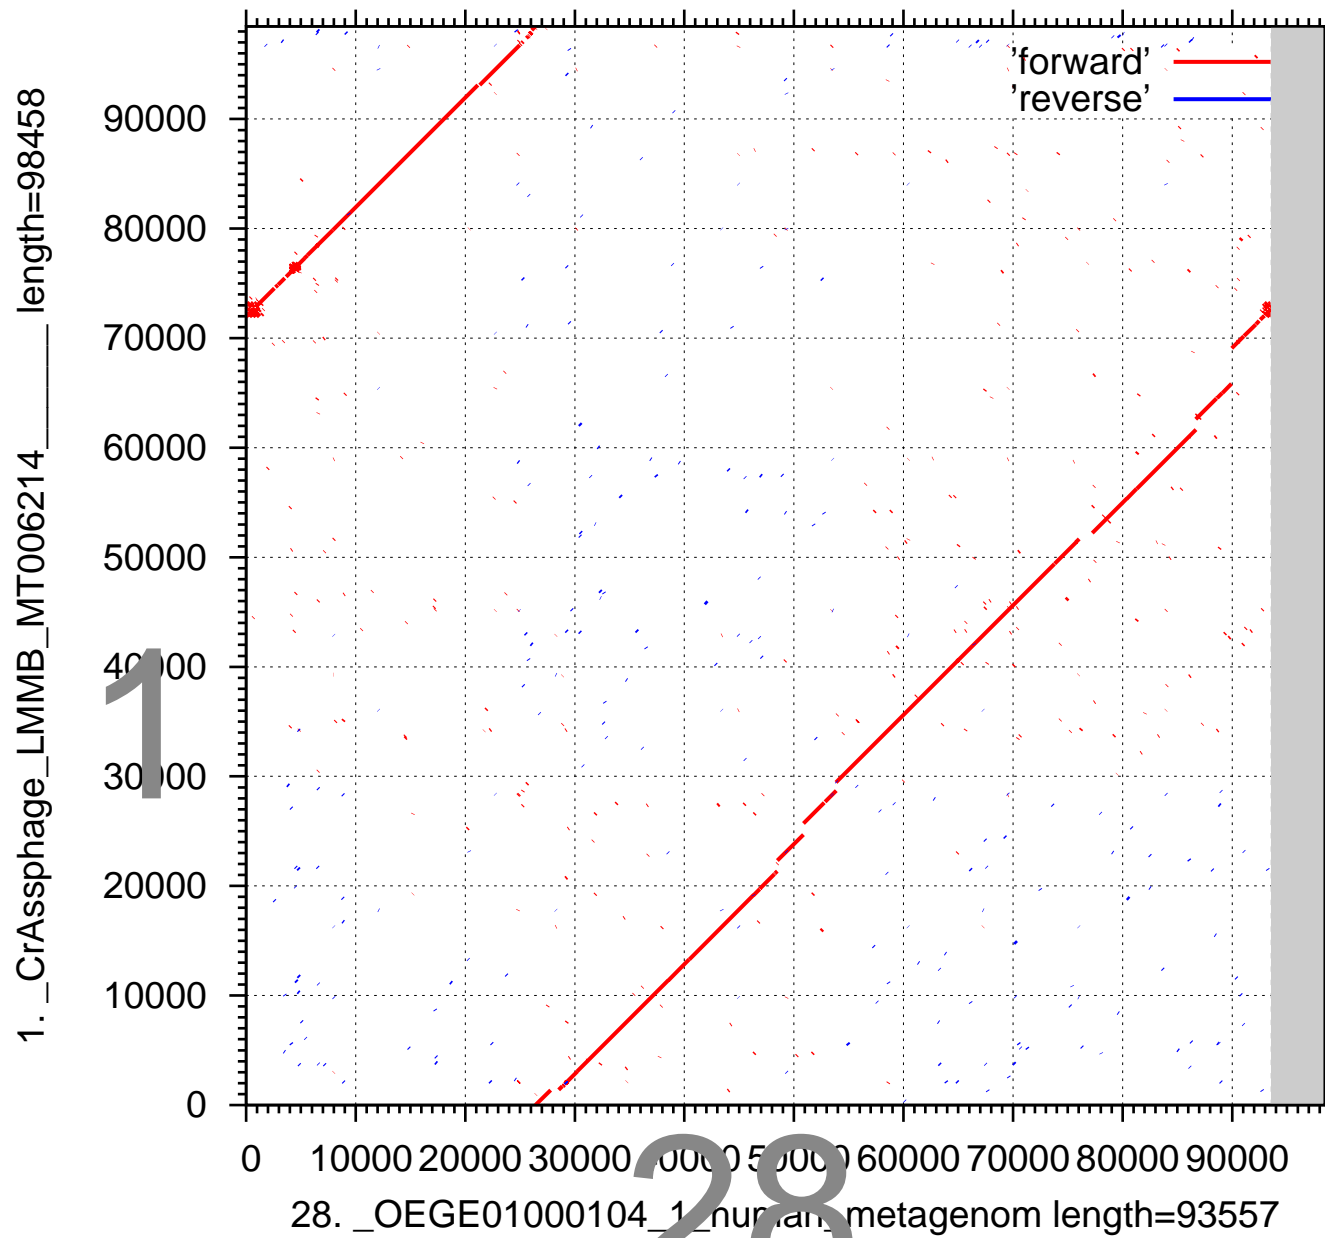

Threshold = 39

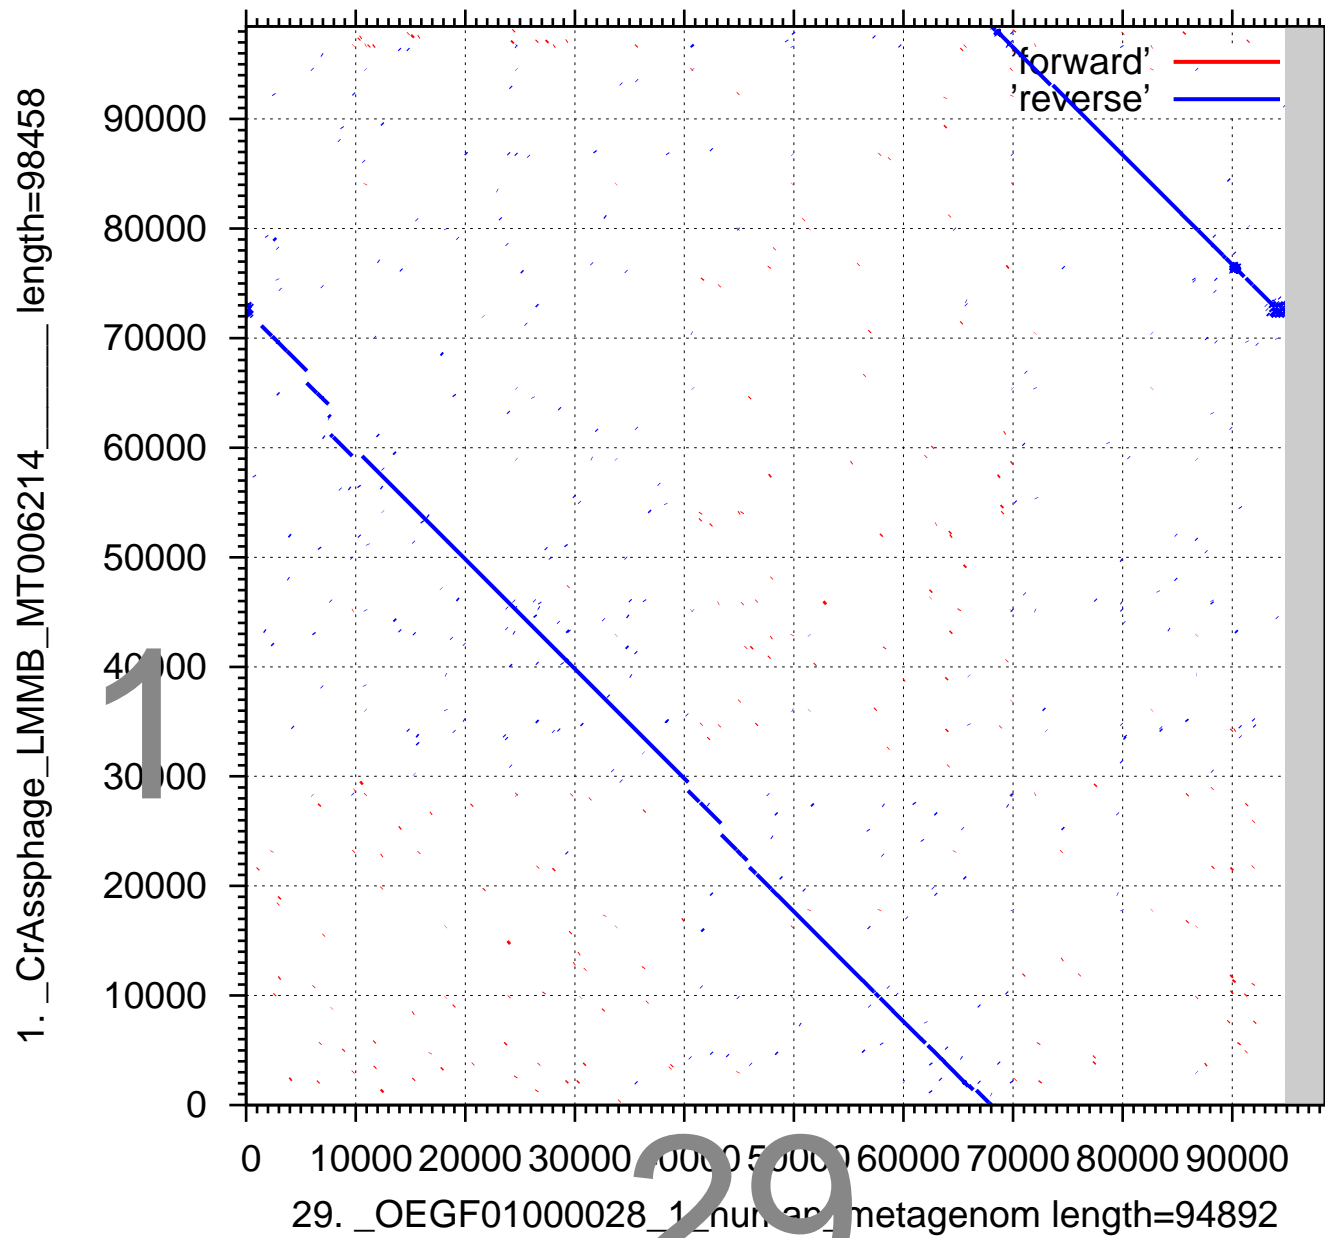

Supplement: s1 [file s1]
