# Supplementary material for: First crAss-Like Phage Genome Encoding the Diversity-Generating Retroelement (DGR)
Source: MDPI journal article supplement (doi:10.3390/v12050573), 2020-05-22
Supplement: s1 [file s1]

|                   | 10                                                                                                            | 20 | 30 | 40 | 50 | 60 | 70 | 80 | 90 | 100 |  |
|-------------------|---------------------------------------------------------------------------------------------------------------|----|----|----|----|----|----|----|----|-----|--|
| TR LMMB           | gtgcttctgcttagcagtaacgctaataacagttctaaagctagctctagtaacttttaattcttaattgagttcagtcagattcttaatgctaattgctggcttcttt |    |    |    |    |    |    |    |    |     |  |
| TR cs_ms_29       | a.g.                                                                                                          |    |    |    |    |    |    |    |    |     |  |
| TR eld314-t0_s_2  |                                                                                                               |    |    |    |    |    |    |    |    |     |  |
| TR err843979_ms_2 | a.                                                                                                            |    |    |    |    |    |    |    |    |     |  |
| TR err843983_ms_1 |                                                                                                               |    |    |    |    |    |    |    |    |     |  |
| TR err844008_ms_2 | a.                                                                                                            |    |    |    |    |    |    |    |    |     |  |
| TR err844022_ms_1 | g.g.                                                                                                          |    |    |    |    |    |    |    |    |     |  |
| TR err844035_ms_4 |                                                                                                               |    |    |    |    |    |    |    |    |     |  |
| TR err844045_ms_1 |                                                                                                               |    |    |    |    |    |    |    |    |     |  |
| TR err844050_ms_1 |                                                                                                               |    |    |    |    |    |    |    |    |     |  |
| TR err844054_ms_2 | t.                                                                                                            |    |    |    |    |    |    |    |    |     |  |
| TR err975089_s_1  |                                                                                                               |    |    |    |    |    |    |    |    |     |  |
| TR fferm_ms_6     | a.g.                                                                                                          |    |    |    |    |    |    |    |    |     |  |
| TR hvcf_a8_ms_1   | a.a.                                                                                                          |    |    |    |    |    |    |    |    |     |  |
| TR hvcf_c9_ms_3   |                                                                                                               |    |    |    |    |    |    |    |    |     |  |
| TR hvcf_d10_ms_2  | a.                                                                                                            |    |    |    |    |    |    |    |    |     |  |
| TR hvcf_d3_ms_2   | a.g.                                                                                                          |    |    |    |    |    |    |    |    |     |  |
| TR hvcf_d6_ms_5   |                                                                                                               |    |    |    |    |    |    |    |    |     |  |
| TR hvcf_e8_ms_1   |                                                                                                               |    |    |    |    |    |    |    |    |     |  |
| TR hvcf_f2_ms_2   |                                                                                                               |    |    |    |    |    |    |    |    |     |  |
| TR inf008_s_1     | a.                                                                                                            |    |    |    |    |    |    |    |    |     |  |
| TR inf058_s_2     |                                                                                                               |    |    |    |    |    |    |    |    |     |  |
| TR ODEE01000202.1 |                                                                                                               |    |    |    |    |    |    |    |    |     |  |
| TR ODHP01000097.1 | t.                                                                                                            |    |    |    |    |    |    |    |    |     |  |
| TR ODIH01000141.1 |                                                                                                               |    |    |    |    |    |    |    |    |     |  |
| TR ODTL01000442.1 |                                                                                                               |    |    |    |    |    |    |    |    |     |  |
| TR ODUE01000042.1 |                                                                                                               |    |    |    |    |    |    |    |    |     |  |
| TR ODVQ01000105.1 | t.                                                                                                            |    |    |    |    |    |    |    |    |     |  |
| TR ODVR01000106.1 |                                                                                                               |    |    |    |    |    |    |    |    |     |  |
| TR OEGE01000104.1 |                                                                                                               |    |    |    |    |    |    |    |    |     |  |
| TR srr073438_s_1  |                                                                                                               |    |    |    |    |    |    |    |    |     |  |

|                   | 10                                                                                                           | 20 | 30 | 40 | 50 | 60 | 70 | 80 | 90 | 100 |  |
|-------------------|--------------------------------------------------------------------------------------------------------------|----|----|----|----|----|----|----|----|-----|--|
| VR LMMB           | atgcttctgcttggcggctcgcgctcattccgggttctcgggctggctctggttaacttttttctacttgggttcagtcagattttgatgctaactgctggcttcttt |    |    |    |    |    |    |    |    |     |  |
| VR cs_ms_29       | g.g.g.g.g.t.a.t.a.g.aa.t.g.g.a.c.c.ca                                                                        |    |    |    |    |    |    |    |    |     |  |
| VR eld314-t0_s_2  | g.a.g.c.ca.at.g.ca.t.g.g.g.c.ta                                                                              |    |    |    |    |    |    |    |    |     |  |
| VR err843979_ms_2 | a.ag.ga.ga.gg.gc.ga.g.c.g.a.c.a.ct                                                                           |    |    |    |    |    |    |    |    |     |  |
| VR err843983_ms_1 | g.g.g.a.a.ga.ga.gg.g.g.c.tc.g                                                                                |    |    |    |    |    |    |    |    |     |  |
| VR err844008_ms_2 | g.at.ag.aa.ca.ca.g.c.g.a.c.ac.gg                                                                             |    |    |    |    |    |    |    |    |     |  |
| VR err844022_ms_1 | g.ta.tc.ga.tt.aa.ta.g.g.g.c.a.ca                                                                             |    |    |    |    |    |    |    |    |     |  |
| VR err844035_ms_4 | g.g.t.ag.ca.tc.a.gg.ga.g.g.t.c.ac.ta                                                                         |    |    |    |    |    |    |    |    |     |  |
| VR err844045_ms_1 | g.ac.t.g.ag.g.aa.ca.g.g.g.c.t                                                                                |    |    |    |    |    |    |    |    |     |  |
| VR err844050_ms_1 | gc.g.g.g.ca.ga.gg.a.t.g.g.a.c.ac.gg                                                                          |    |    |    |    |    |    |    |    |     |  |
| VR err844054_ms_2 | g.g.g.g.g.gat.t.gg.gc.ga.g.gta.c.tc.c                                                                        |    |    |    |    |    |    |    |    |     |  |
| VR err975089_s_1  | g.ta.cg.gc.ac.ta.g.g.a.c.c.tt                                                                                |    |    |    |    |    |    |    |    |     |  |
| VR fferm_ms_6     | g.g.g.g.t.g.ag.a.t.ct.a.g.gaa.c.c.tt                                                                         |    |    |    |    |    |    |    |    |     |  |
| VR hvcf_a8_ms_1   | g.g.gg.a.ttt.t.a.ag.a.g.c.a.a.a                                                                              |    |    |    |    |    |    |    |    |     |  |
| VR hvcf_c9_ms_3   | g.ta.g.cg.tc.c.ga.ga.g.g.a.a.tg                                                                              |    |    |    |    |    |    |    |    |     |  |
| VR hvcf_d10_ms_2  | g.ta.aa.gc.ggg.aa.cg.g.g.a.c.g.g                                                                             |    |    |    |    |    |    |    |    |     |  |
| VR hvcf_d3_ms_2   | g.g.g.a.t.ga.g.g.c.ga.g.g.c.ag.ta                                                                            |    |    |    |    |    |    |    |    |     |  |
| VR hvcf_d6_ms_5   | g.a.g.aa.t.a.c.aa.ga.g.g.a.c.ta                                                                              |    |    |    |    |    |    |    |    |     |  |
| VR hvcf_e8_ms_1   | g.t.t.t.gg.ca.gg.a.g.g.a.c.cg.ta.tg                                                                          |    |    |    |    |    |    |    |    |     |  |
| VR hvcf_f2_ms_2   | g.g.at.aa.ga.g.cg.ga.g.g.a.c.t.ca.g                                                                          |    |    |    |    |    |    |    |    |     |  |
| VR inf008_s_1     | g.ga.aa.g.gg.a.gg.g.gt.c.ac.g                                                                                |    |    |    |    |    |    |    |    |     |  |
| VR inf058_s_2     | g.a.a.tt.g.a.c.g.g.g.c.g.g                                                                                   |    |    |    |    |    |    |    |    |     |  |
| VR ODEE01000202.1 | g.ag.at.t.c.a.a.g.g.a.c.c                                                                                    |    |    |    |    |    |    |    |    |     |  |
| VR ODHP01000097.1 | g.g.g.gata.t.g.g.a.a.ga.a.g.a.ag.ga                                                                          |    |    |    |    |    |    |    |    |     |  |
| VR ODIH01000141.1 | g.t.ag.aa.g.a.ca.g.tgta.c.g.ca                                                                               |    |    |    |    |    |    |    |    |     |  |
| VR ODTL01000442.1 | g.gc.gg.ga.c.a.g.g.g.g.t.c.c.caa                                                                             |    |    |    |    |    |    |    |    |     |  |
| VR ODUE01000042.1 | g.g.ga.a.gg.a.ta.g.g.a.c.ac.a                                                                                |    |    |    |    |    |    |    |    |     |  |
| VR ODVQ01000105.1 | g.a.tt.g.t.tc.ca.cg.g.g.a.c.tc.ta                                                                            |    |    |    |    |    |    |    |    |     |  |
| VR ODVR01000106.1 | g.g.a.g.ga.t.t.ca.tg.g.g.a.c.c.g.g                                                                           |    |    |    |    |    |    |    |    |     |  |
| VR srr073438_s_1  | g.g.ga.gc.g.ca.g.g.gaa.c.c.ta                                                                                |    |    |    |    |    |    |    |    |     |  |
